# Supplementary material
Source: PubMed Central journal article supplement (PMC4227544)

*Supporting Information for*

**Efficient and Stereocontrolled Synthesis of 1,2,4-Trioxolanes Useful for Ferrous Iron-Dependent Drug Delivery**

Shaun D. Fontaine, Antonio DiPasquale, and Adam R. Renslo

**Table of Contents**

|                                                                    |    |
|--------------------------------------------------------------------|----|
| General Procedures.....                                            | 1  |
| Materials.....                                                     | 1  |
| Instrumentation.....                                               | 2  |
| Synthetic Procedures.....                                          | 2  |
| Crystallographic Procedures and Data .....                         | 8  |
| Supplemental Figure S1 .....                                       | 17 |
| Copies of NMR Spectra and LC Chromatograms for new compounds ..... | 18 |
| Check CIF/PLATON report.....                                       | 29 |

**General Procedures:** Reactions were magnetically stirred unless otherwise indicated. Air and/or moisture sensitive reactions were carried out under an argon atmosphere in oven-dried glassware using anhydrous solvents from commercial suppliers. Air and/or moisture sensitive reagents were transferred via syringe or cannula and were introduced into reaction vessels through rubber septa. Reaction product solutions and chromatography fractions were concentrated by rotary evaporation at room temperature at 20 Torr then at 0.5 Torr unless otherwise indicated. Thin phase chromatography was performed on EMD precoated glass-backed silica gel 60 F-254 0.25 mm plate.

**Materials:** All chemical reagents and solvents used were purchased from Sigma-Aldrich or Fisher Scientific. Anhydrous dichloromethane and tetrahydrofuran (EMD Drisolv) were used without further purification. Ketone **6**, ketone **9**, and Oxime **11** were prepared as described previously (see below).

**Preparation of 6:** Fontaine, S. D.; Spangler, B. S.; Gut, J.; Lauterwasser, E. M. W.; Rosenthal, P. J.; Renslo, A. R. *ChemMedChem*, **2014**, *9*, accepted.

**Preparation of 9:** Karmee, S. K.; van Oosten, R.; Hanefeld, U. *Tetrahedron: Asymmetry* **2011**, *22*, 1736-1739.

**Preparation of 11:** Vennerstrom, J. L.; Dong, Y.; Chollet, J.; Matile, H.; Padmanilayam, M.; Tang, Y.; Charman, W. N. Preparation of spiro and dispiro 1,2,4-trioxolane as antimalarials. U.S. Pat. Appl. Publ., 20040186168, 23 Sep 2004)

**Instrumentation:** <sup>1</sup>H NMR spectra were recorded on a Varian INOVA-400 400 MHz spectrometer. Chemical shifts are reported in δ units (ppm). NMR spectra were referenced relative to residual NMR solvent peaks. Coupling constants (J) are reported in hertz (Hz). Column chromatography was performed on Silicycle Sili-prep cartridges using a Biotage Isolera Four automated flash chromatography system. LC/MS and compound purity were determined using Waters Micromass ZQTM, equipped with Waters 2795 Separation Module and Waters 2996 Photodiode Array Detector. Separations were carried out with an XTerra® MS C18, 5μm, 4.6 x 50 mm column, at ambient temperature (unregulated) using a mobile phase of water-acetonitrile containing a constant 0.20 % formic acid. High resolution MS data was collected at the UCSF Mass Spectrometry Facility.

## Synthetic Procedures

**3'' ethenyldispiro[adamantane 2,2' [1,3,5]trioxolane 4',1'' cyclohexane] 3'' ol (8).** A heat-gun dried, 25-mL, two-necked round bottom flask equipped with an argon inlet adapter, stirbar, and rubber septum was charged with CeCl<sub>3</sub> (110 mg, 0.446 mmol, 1.2 equiv) evacuated, heated with a heat gun, back filled with argon, and allowed to cool to rt. A solution of ketone **6**

(100 mg, 0.359 mmol, 1 equiv) in THF (5 mL) was added and the resulting mixture was stirred at rt for 1 h and then sonicated at rt for 5 min. The resulting suspension was cooled at -78 °C while a solution of vinyl magnesium bromide (0.480 mL, 0.431 mmol, 1.2 equiv) was added dropwise via syringe such that the internal temperature did not exceed -70 °C. The reaction mixture was stirred for 30 min at -78 °C. Another portion of vinylmagnesium bromide (0.480 mL, 0.431 mmol, 1.2 equiv) was added dropwise via syringe and the reaction mixture was stirred at -78 °C for 30 min. The reaction mixture was diluted with 20 mL of EtOAc, 20 mL of H<sub>2</sub>O, and 10 mL of 10% aq KHSO<sub>4</sub> solution. The aqueous layer was separated and extracted with three 20-mL portions of EtOAc. The combined organic phases were washed with 20 mL of satd. aq. NaCl solution, dried over MgSO<sub>4</sub>, filtered, and concentrated to afford a pale yellow oil. A solution of this material in 5 mL of CH<sub>2</sub>Cl<sub>2</sub> was deposited onto silica gel. The resulting free flowing powder was loaded atop a 25 g column of silica gel. Gradient elution (2-20% EtOAc/hexanes) afforded two separable diastereomers of **8** (0.028 g, 25% yield and 0.034 g, 31% yield).

**8** (minor diastereomer): <sup>1</sup>H NMR (400 MHz, CDCl<sub>3</sub>) δ 5.88 (dd, *J*=17.2, 10.8 Hz, 1 H), 5.30 (dd, *J*=17.2, 1.5 Hz, 1 H), 5.06 (dd, *J*=10.8, 1.5 Hz, 1 H), 3.92 (s, 1 H), 1.67 - 2.08 (m, 20 H), 1.51 - 1.60 (m, 1 H), 1.41 ppm (td, *J*=13.3, 4.1 Hz, 1 H); <sup>13</sup>C NMR (400MHz, CDCl<sub>3</sub>) δ 144.3, 112.8, 112.4, 109.3, 73.1, 43.8, 36.9, 36.8, 36.4, 36.1, 35.5, 35.0, 34.94, 34.90, 33.6, 26.9, 26.6, 19.3.

**8** (major diastereomer): <sup>1</sup>H NMR (400 MHz, CDCl<sub>3</sub>) δ 5.90 (dd, *J* = 16.0, 11.2 Hz, 1 H), 5.31 (d, *J* = 17.0 Hz, 1 H), 5.05 (d, *J* = 10.8 Hz, 1 H), 2.70 (s, 1 H), 1.57-2.02 (m, 21 H), 1.43 (td, *J* = 13.0, 4.8 Hz, 1 H); <sup>13</sup>C NMR (400 MHz, CDCl<sub>3</sub>) δ 144.3, 112.8, 112.5, 109.3, 73.1, 43.8, 36.9, 36.8, 36.4, 36.1, 35.5, 35.0, 34.96, 34.9, 33.6, 26.9, 26.6, 19.3; LRMS (ESI) *m/z* [M+H]<sup>+</sup> calcd for C<sub>18</sub>H<sub>26</sub>O<sub>4</sub>: 307.1904; found: 307.1900.

**3 [(tert butyldiphenylsilyloxy)cyclohexan 1 one (10)**. A 100-mL recovery flask equipped with a stirbar, rubber septum, and argon inlet was charged with 3-hydroxycyclohexan-1-one (**9**) (1.96 g, 17.2 mmol, 1.0 equiv.), N,N-dimethylformamide (35 mL), and imidazole (2.34 g, 34 mmol, 2.0 equiv). The mixture was cooled at 0 °C while tert-butyl(chloro)diphenyl silane (4.69 mL, 18.0 mmol, 1.1 equiv.) was added rapidly dropwise via syringe. The reaction mixture was allowed to warm to slowly warm to rt, stir at rt for 18 h. The reaction mixture was then diluted with 100 mL of Et<sub>2</sub>O and 15 mL H<sub>2</sub>O and 15 mL 10% aq KSOH<sub>4</sub>. The organic phase was

separated and washed with 3 30-mL portions of 5% aq KHSO<sub>4</sub> solution, washed with 30 mL of satd. aq. NaCl solution, dried over MgSO<sub>4</sub>, filtered, and concentrated to afford a colorless oil. Purification via column chromatography on 120 g of silica gel (gradient elution with 0-40% EtOAc/hexanes) afforded 5.71 g of **10** (contaminated with 12% by weight t-BuPh<sub>2</sub>SiOH, calculated yield ~80-85%) as a colorless oil that was used in the next step without further purification: IR (neat): 3071, 3047, 2998, 2932, 2892, 2857, 1716, 1487, 1472, 1462, 1427, 1361, 1332, 1315, 1283, 1220, 1111, 1093, 1037, 999, 938, 909, 863, 822, 786, 740, 703, 675, 612 cm<sup>-1</sup>; <sup>1</sup>H NMR (400MHz, CDCl<sub>3</sub>) δ 7.65 - 7.70 (m, 4 H), 7.37 - 7.48 (m, 6 H), 4.21 (app. quin, *J* = 4.9 Hz, 1 H), 2.45 (d, *J* = 4.9 Hz, 2 H), 2.33 - 2.41 (m, 1 H), 2.22 - 2.31 (m, *J* = 5.3 Hz, 1 H), 2.09 - 2.21 (m, 1 H), 1.76 - 1.82 (m, 2 H), 1.60 - 1.71 (m, 1 H), 1.08 ppm (s, 9 H); <sup>13</sup>C (100 MHz, CDCl<sub>3</sub>) δ 210.1, 136.0, 135.9, 135.0 (TBDPSOH), 134.1, 133.8, 130.0, 129.9, 129.8 (TBDPSOH), 127.91 (TBDPSOH), 127.88, 127.8, 71.2, 50.6, 41.3, 33.1, 27.1, 26.8 (TBDPSOH), 20.7, 19.4; HRMS (ESI) *m/z* [2M+H]<sup>+</sup> calcd for C<sub>22</sub>H<sub>28</sub>O<sub>2</sub>Si: 705.3795; found: 705.3776.

**Dispiro[adamantane-2,2'-[1,3,5]trioxolane-4',1''-cyclohexane]-3''-ol (13).** A 200-mL recovery flask was charged with ketone **10** (3.00 g), carbon tetrachloride (130 mL), and oxime **11** (3.0 g, 17 mmol, ca. 2 equiv). The reaction mixture was cooled at 0 °C while ozone (0.6 L/min, 30% power) was bubbled through the reaction mixture for 1 h. Additional oxime (0.750 g, 4.18 mmol, ca. 0.5 equiv) was added in a single portion and ozone was bubbled through the reaction mixture for an additional 1 h. The reaction mixture was then sparged with O<sub>2</sub> for 5 min, sparged with argon for 5 min, and concentrated to afford intermediate **12** as colorless semi solid.

The crude **12** prepared above was cooled at 0 °C and a solution of TBAF (1.0 M in THF, 40 mL, 40 mmol, ca. 4.7 equiv) was added in a single portion. The resulting reaction mixture was stirred at rt for 3.5 h then diluted with 40 mL of EtOAc and 30 mL of H<sub>2</sub>O. The aqueous layer was separated and extracted with four 30-mL portions of EtOAc. The combined organic phases were washed with 40 mL of satd. aq. NaHCO<sub>3</sub> solution, dried over MgSO<sub>4</sub>, filtered, and concentrated to afford a yellow oil. Purification via column chromatography on 120 g of silica gel (elution with 0-50% EtOAc/Hex) afforded 1.67 g of alcohol **13** as a 90:10 mixture of diastereomers (67% over 3-steps from **9**) as a colorless semi-solid: IR (neat) 3346, 2933, 2858, 1452, 1382, 1351,

1312, 1252, 1223, 1157, 1122, 1087, 1066, 1046, 1028, 938, 926, 434  $\text{cm}^{-1}$ ;  $^1\text{H}$  NMR ( $\text{CDCl}_3$ , 400 MHz)  $\delta$  4.03 - 3.91 (m, 1 H), 2.57 (br. s., 1 H), 2.13 - 1.46 (m, 22 H);  $^{13}\text{C}$  NMR ( $\text{CDCl}_3$ , 100 MHz)  $\delta$  112.1, 109.3, 68.2, 41.9, 36.9, 36.4, 36.4, 35.2, 35.1, 34.97, 34.95, 34.0, 33.3, 27.0, 26.6, 19.3; HRMS (ESI)  $m/z$   $[\text{M}+\text{H}]^+$  calcd for  $\text{C}_{16}\text{H}_{24}\text{O}_4$ : 281.1747; found: 281.1736

**3'' methoxydispiro[adamantane 2,2' [1,3,5]trioxolane 4',1'' cyclohexane] (7).** A 4-mL, scintillation vial equipped with a screw cap and stirbar was charged with alcohol **13** (0.020 g, 0.1 mmol, 1.0 equiv.), DMSO (0.5 mL), crushed/powdered KOH (0.100 g, 1.78 mmol, 25 equiv), and iodomethane (22  $\mu\text{L}$ , 0.357 mmol, 5 equiv). The reaction mixture was stirred at rt for 30 min. The reaction mixture was diluted with 20 mL of EtOAc and 20 mL of  $\text{H}_2\text{O}$ . The aqueous layer was separated and extracted with three 20-mL portions of EtOAc. The combined organic phases were washed with 25 mL of satd. aq. NaCl solution, dried over  $\text{MgSO}_4$ , filtered, and concentrated to afford a pale yellow oil. Purification via column chromatography on 12 g of silica gel (elution with 5-15% EtOAc/hexanes) afforded 0.019 g (91%) of methyl ether **7** (90:10 dr) as a colorless oil: IR (neat) 2914, 2857, 1452, 1372, 1350, 1300, 1263, 1221, 1167, 1115, 1087, 1086, 1066, 1021, 926, 478  $\text{cm}^{-1}$ ;  $^1\text{H}$  NMR ( $\text{CDCl}_3$ , 400 MHz)  $\delta$  3.39-3.48 (m, 1 H, minor diastereomer), 3.36 (s, 3 H, minor diastereomer), 3.35 (s, 3 H), 3.27 (tt,  $J=11.2$ , 4.3 Hz, 1 H), 2.30 (ddt,  $J=12.8$ , 4.4, 2.3 Hz, 1 H), 2.18-2.23 (ddt,  $J = 12.3$ , 4.1, 1.9 Hz, minor diastereomer), 1.65 - 2.08 (m, 17 H), 1.53 - 1.63 (m, 3 H), 1.40 (qt,  $J = 13.4$ , 3.6 Hz, 1 H), 1.06-1.16 ppm (m, 1 H);  $^{13}\text{C}$  NMR ( $\text{CDCl}_3$ , 100 MHz)  $\delta$  112.5, 110.5, 78.6, 56.3, 41.6, 38.04, 37.96, 37.9, 36.0, 35.95, 35.92, 35.90, 35.2, 31.7, 28.5, 28.1, 21.1; HRMS (ESI)  $m/z$   $[\text{M}+\text{H}]^+$  calcd for  $\text{C}_{17}\text{H}_{26}\text{O}_4$ : 295.1904; found: 295.1894.

**Dispiro[adamantane 2,2' [1,3,5]trioxolane 4',1'' cyclohexane] 3'' yl 4 nitrobenzoate (14).** A 4-mL vial was charged with alcohol **13** (0.050 g, 0.2 mmol, 1.0 equiv.), 4-nitrobenzoic acid (0.045 g, 0.268 mmol, 1.5 equiv), 4-dimethylaminopyridine (0.011 g, 0.089 mmol, and  $\text{N,N}'$ -dicyclohexylcarbodiimide (0.055 g, 0.31mmol, 1.5 equiv.), and then dichloromethane (1 mL). The reaction mixture was stirred at rt for 2 h and then diluted with 3 mL of EtOAc and filtered with the aid of  $\sim 10$  mL EtOAc. The resulting filtrate was washed with 10 mL satd. aq.  $\text{NaHCO}_3$  solution. The aqueous phase was separated and extracted with three 5-mL portions of

EtOAc. The combined organic phases were dried over  $\text{MgSO}_4$ , filtered, and concentrated to afford a colorless semi-solid. The resulting residue was dissolved in 10 mL of 10% MeOH/ $\text{CH}_2\text{Cl}_2$  and deposited onto 5 g of silica gel. The resulting free flowing powder was loaded atop a 12 g silica gel cartridge and gradient elution (5-100% 15CV EtOAc/Hex) afforded 0.051 g (67%) of benzoate **14** (90:10 dr) as colorless powder: IR (thin film,  $\text{Et}_2\text{O}$ ) 2915, 2858, 1724, 1529, 1468, 1451, 1433, 1382, 1321, 1275, 1231, 1170, 1112, 1087, 1073, 1043, 1020, 986, 874, 836, 720  $\text{cm}^{-1}$ ;  $^1\text{H}$  NMR ( $\text{CDCl}_3$ , 400 MHz)  $\delta$  8.25 - 8.30 (m, 2 H), 8.20 - 8.24 (m, 2 H), 5.19 (tt,  $J=9.2$ , 4.7 Hz, 1 H), 2.29 - 2.36 (m, 1 H), 1.52 - 2.08 ppm (m, 21 H);  $^{13}\text{C}$  NMR ( $\text{CDCl}_3$ , 100 MHz)  $\delta$  163.9, 150.7, 136.1, 130.9, 123.6, 112.1, 108.5, 72.3, 39.5, 36.9, 36.5, 35.0, 35.0, 34.9, 34.8, 34.2, 30.3, 27.0, 26.6, 19.8; HRMS (ESI)  $m/z$   $[\text{M}+\text{H}]^+$  calcd for  $\text{C}_{23}\text{H}_{27}\text{NO}_7$ : 430.1860; found: 430.1855.

**Dispiro[adamantane-2,2'-[1,3,5]trioxolane-4',1''-cyclohexane]-3''-yl 4-nitrophenyl carbonate (15).** A 50-mL heat-gun dried, two-necked, round-bottomed flask equipped with a stirbar, argon inlet adapter and rubber septum was charged with alcohol **13** (0.500 g, 1.78 mmol, 1.0 equiv), dichloromethane (7 mL), *N,N*-diisopropylethylamine (0.932 mL, 5.35 mmol, 3.0 equiv), and 4-dimethylaminopyridine (0.218 g, 1.78 mmol, 1 equiv). The mixture was cooled to 0 °C while 4-nitrophenyl chloroformate (0.719 g, 3.57 mmol, 2 equiv) was added as a solid in two portions (some gas evolution observed). The reaction mixture was stirred at 0 °C for 15 min, allowed to warm to rt over 10 min, and stirred at rt for 10 min. The reaction mixture was diluted with 30 mL of  $\text{Et}_2\text{O}$ , washed with 10 mL of 5% aq  $\text{KHSO}_4$  solution, washed with five 10-mL portions of satd aq  $\text{NaHCO}_3$  solution, washed with 25 mL of satd aq  $\text{NaCl}$  solution, dried over  $\text{MgSO}_4$ , filtered, and concentrated to afford a yellow/orange semi-solid. This material was dissolved in 25 mL of  $\text{CH}_2\text{Cl}_2$  and deposited onto 5 g of silica gel. The free flowing powder was loaded atop a 80 g silica gel cartridge. Gradient elution (0-20% EtOAc/hexanes) afforded 0.747 g (94%) of carbonate **15** (93:7 dr) as pale yellow glassy oil: IR (neat) 2915, 2859, 1765, 1615, 1594, 1526, 1493, 1452, 1348, 1259, 1215, 1168, 1114, 1140, 1087, 1067, 1045, 1020, 980, 858, 758  $\text{cm}^{-1}$ ;  $^1\text{H}$  NMR (400 MHz,  $\text{CDCl}_3$ )  $\delta$  8.26 - 8.31 (m, 2 H), 7.36 - 7.41 (m, 2 H), 4.81 - 4.90 (m, 1 H), 4.92 - 5.00 (m, 1 H, minor diastereomer), 2.40 (ddt,  $J=12.9$ , 4.3, 1.9 Hz, 1 H), 2.33 - 2.36 (m, 1 H, minor diastereomer), 2.07 - 2.15 (m, 1 H), 1.64 - 2.03 (m, 18 H), 1.55 ppm (m, 2 H);  $^{13}\text{C}$  NMR (100 MHz,  $\text{CDCl}_3$ )  $\delta$  155.7, 151.8, 145.5, 125.5, 121.9, 112.2, 108.5, 76.4, 39.8,

36.9, 36.6, 36.5, 35.1, 35.0, 34.9, 33.7, 30.3, 27.0, 26.6, 19.8; HRMS (ESI)  $m/z$   $[M+H]^+$  calcd for  $C_{23}H_{27}NO_8$ : 445.1809; found 446.1789.

**Dispiro[adamantane-2,2'-[1,3,5]trioxolane-4',1''-cyclohexane]-3''-yl N-(2-amino-2-methylpropyl)carbamate (16).** A 20-mL scintillation vial was charged with carbonate **15** (0.300 g, 0.673 mmol, 1.0 equiv), N,N-dimethylformamide (2 mL), N,N-diisopropylethylamine (0.235 mL, 1.35 mmol, 2 equiv). 2-Methylpropane-1,2-diamine (0.105 mL, 1.01 mmol, 1.5 equiv) was added in a single portion via microliter pipettor. The reaction was stirred at rt for 1h. The reaction mixture was diluted with 30 mL of EtOAc and washed with four 15-mL portions of 1 M aq NaOH solution (until aqueous was no longer bright yellow), washed with 20 mL of satd aq NaCl, dried over  $MgSO_4$ , filtered, and concentrated to afford a yellow oil. Purification via column chromatography on 25 g of silica gel (75-100% EtOAc/hexanes and then 0-15% MeOH/ $CH_2Cl_2$ ) afforded 0.248 g (93%) of carbamate **16** (>95:5 dr) as a yellow foamy/sticky oil: IR (neat) 3343, 2933, 2916, 2859, 1702, 1560, 1542, 1452, 1352, 1298, 1250, 1122, 1146, 1114, 1087, 1067, 142, 1021, 1010, 929, 774  $cm^{-1}$ ;  $^1H$  NMR (400MHz,  $CDCl_3$ )  $\delta$  = 5.10 (br. t,  $J$  = 5.9 Hz, 1 H), 4.68 - 4.78 (m, 1 H), 3.01-3.12 (m, 2 H), 2.26 (dt,  $J$  = 13.0, 2.2 Hz, 1 H), 1.44 - 2.05 (m, 20 H), 1.21 - 1.35 (m, 1 H), 1.12 ppm (s, 6 H);  $^{13}C$  NMR (100 MHz,  $CDCl_3$ )  $\delta$  156.5, 111.7, 109.0, 71.1, 52.4, 50.6, 40.5, 37.0, 36.5, 35.1, 35.0, 34.9, 34.0, 31.0, 28.3, 28.2, 27.1, 26.7, 20.0; HRMS (ESI)  $m/z$   $[M+H]^+$  calcd for  $C_{21}H_{34}N_2O_5$ : 395.2540; found: 395.2526.

## Crystallographic Procedures and Data

X-ray quality crystals were grown from a saturated toluene/ethanol/methanol solution followed by vapor diffusion of hexane, which was then allowed to partially evaporate at room temperature. After evaporation of 50% of the solvent volume, the sample was cooled to 3 degrees Celsius and allowed to sit for a week before crystals were harvested. A colorless plate 0.080 x 0.080 x 0.030 mm in size was mounted on a Cryoloop with Paratone oil. Data were collected in a nitrogen gas stream at 100(2) K using phi and omega scans. Crystal-to-detector distance was 60 mm and exposure time was 10 seconds per frame using a scan width of 1.0°. Data collection was 99.6% complete to 67.000° in  $\theta$ . A total of 44013 reflections were collected covering the indices,  $-6 \leq h \leq 7$ ,  $-15 \leq k \leq 15$ ,  $-57 \leq l \leq 57$ . 3753 reflections were found to be symmetry independent, with an  $R_{\text{int}}$  of 0.0303. Indexing and unit cell refinement indicated a primitive, orthorhombic lattice. The space group was found to be  $Pbc_a$  (No. 61). The data were integrated using the Bruker SAINT software program and scaled using the SADABS software program. Solution by iterative methods (SHELXT) produced a complete heavy-atom phasing model consistent with the proposed structure. All non-hydrogen atoms were refined anisotropically by full-matrix least-squares (SHELXL-2014). All hydrogen atoms were placed using a riding model. Their positions were constrained relative to their parent atom using the appropriate HFIX command in SHELXL-2014.



**Table S1.** Crystal data and structure refinement for *trans*-14.

|                                   |                                                  |          |
|-----------------------------------|--------------------------------------------------|----------|
| Empirical formula                 | C <sub>23</sub> H <sub>27</sub> N O <sub>7</sub> |          |
| Formula weight                    | 429.45                                           |          |
| Temperature                       | 100(2) K                                         |          |
| Wavelength                        | 1.54178 Å                                        |          |
| Crystal system                    | Orthorhombic                                     |          |
| Space group                       | P b c a                                          |          |
| Unit cell dimensions              | a = 6.6484(4) Å                                  | α = 90°. |
|                                   | b = 12.9963(8) Å                                 | β = 90°. |
|                                   | c = 47.799(3) Å                                  | γ = 90°. |
| Volume                            | 4130.1(4) Å <sup>3</sup>                         |          |
| Z                                 | 8                                                |          |
| Density (calculated)              | 1.381 Mg/m <sup>3</sup>                          |          |
| Absorption coefficient            | 0.850 mm <sup>-1</sup>                           |          |
| F(000)                            | 1824                                             |          |
| Crystal size                      | 0.080 x 0.080 x 0.030 mm <sup>3</sup>            |          |
| Theta range for data collection   | 3.699 to 68.287°.                                |          |
| Index ranges                      | -6 ≤ h ≤ 7, -15 ≤ k ≤ 15, -57 ≤ l ≤ 57           |          |
| Reflections collected             | 44013                                            |          |
| Independent reflections           | 3753 [R(int) = 0.0303]                           |          |
| Completeness to theta = 67.000°   | 99.6 %                                           |          |
| Absorption correction             | Semi-empirical from equivalents                  |          |
| Max. and min. transmission        | 0.929 and 0.783                                  |          |
| Refinement method                 | Full-matrix least-squares on F <sup>2</sup>      |          |
| Data / restraints / parameters    | 3753 / 0 / 280                                   |          |
| Goodness-of-fit on F <sup>2</sup> | 1.076                                            |          |
| Final R indices [I > 2σ(I)]       | R1 = 0.0712, wR2 = 0.1864                        |          |
| R indices (all data)              | R1 = 0.0727, wR2 = 0.1873                        |          |
| Extinction coefficient            | n/a                                              |          |
| Largest diff. peak and hole       | 0.333 and -0.383 e.Å <sup>-3</sup>               |          |

**Table S2.** Atomic coordinates ( $\times 10^4$ ) and equivalent isotropic displacement parameters ( $\text{\AA}^2 \times 10^3$ ) for *trans*-**14**.  $U(\text{eq})$  is defined as one third of the trace of the orthogonalized  $U^{\text{ij}}$  tensor.

|       | x       | y       | z       | $U(\text{eq})$ |
|-------|---------|---------|---------|----------------|
| C(1)  | 3580(5) | 7135(2) | 4161(1) | 31(1)          |
| C(2)  | 2926(5) | 6016(2) | 4170(1) | 37(1)          |
| C(3)  | 777(5)  | 5934(3) | 4282(1) | 45(1)          |
| C(4)  | 663(5)  | 6394(3) | 4575(1) | 44(1)          |
| C(5)  | 2096(6) | 5820(3) | 4770(1) | 51(1)          |
| C(6)  | 4254(6) | 5924(3) | 4660(1) | 46(1)          |
| C(7)  | 4809(6) | 7072(3) | 4647(1) | 41(1)          |
| C(8)  | 3398(5) | 7627(2) | 4448(1) | 33(1)          |
| C(9)  | 1219(5) | 7527(3) | 4553(1) | 38(1)          |
| C(10) | 4374(5) | 5453(3) | 4370(1) | 44(1)          |
| C(11) | 5638(5) | 8012(2) | 3854(1) | 30(1)          |
| C(12) | 7300(5) | 8764(2) | 3920(1) | 33(1)          |
| C(13) | 7485(5) | 9594(2) | 3693(1) | 34(1)          |
| C(14) | 7785(5) | 9092(3) | 3405(1) | 33(1)          |
| C(15) | 6036(5) | 8384(2) | 3343(1) | 29(1)          |
| C(16) | 5803(5) | 7548(2) | 3563(1) | 31(1)          |
| C(17) | 6133(4) | 8328(2) | 2841(1) | 26(1)          |
| C(18) | 6374(4) | 7628(2) | 2595(1) | 24(1)          |
| C(19) | 6145(4) | 8050(2) | 2329(1) | 25(1)          |
| C(20) | 6366(4) | 7438(2) | 2094(1) | 26(1)          |
| C(21) | 6842(4) | 6411(2) | 2131(1) | 25(1)          |
| C(22) | 7081(4) | 5968(2) | 2393(1) | 26(1)          |
| C(23) | 6828(4) | 6587(2) | 2626(1) | 26(1)          |
| N(1)  | 7121(4) | 5763(2) | 1882(1) | 30(1)          |
| O(1)  | 2415(3) | 7662(2) | 3953(1) | 35(1)          |
| O(2)  | 3754(3) | 8531(2) | 3891(1) | 32(1)          |
| O(3)  | 5597(3) | 7207(2) | 4058(1) | 33(1)          |
| O(4)  | 6345(3) | 7813(2) | 3083(1) | 28(1)          |
| O(5)  | 5783(3) | 9239(2) | 2823(1) | 31(1)          |
| O(6)  | 8163(3) | 4988(2) | 1905(1) | 36(1)          |
| O(7)  | 6305(4) | 6031(2) | 1665(1) | 40(1)          |

**Table S3.** Bond lengths [ $\text{\AA}$ ] and angles [ $^\circ$ ] for *trans*-14.

|                |          |                |          |
|----------------|----------|----------------|----------|
| C(1)-O(3)      | 1.432(4) | C(12)-C(13)    | 1.535(4) |
| C(1)-O(1)      | 1.434(4) | C(12)-H(12A)   | 0.9900   |
| C(1)-C(2)      | 1.519(4) | C(12)-H(12B)   | 0.9900   |
| C(1)-C(8)      | 1.520(4) | C(13)-C(14)    | 1.534(4) |
| C(2)-C(3)      | 1.529(5) | C(13)-H(13A)   | 0.9900   |
| C(2)-C(10)     | 1.541(5) | C(13)-H(13B)   | 0.9900   |
| C(2)-H(2)      | 1.0000   | C(14)-C(15)    | 1.512(4) |
| C(3)-C(4)      | 1.526(5) | C(14)-H(14A)   | 0.9900   |
| C(3)-H(3A)     | 0.9900   | C(14)-H(14B)   | 0.9900   |
| C(3)-H(3B)     | 0.9900   | C(15)-O(4)     | 1.464(3) |
| C(4)-C(9)      | 1.522(5) | C(15)-C(16)    | 1.521(4) |
| C(4)-C(5)      | 1.528(5) | C(15)-H(15)    | 1.0000   |
| C(4)-H(4)      | 1.0000   | C(16)-H(16A)   | 0.9900   |
| C(5)-C(6)      | 1.534(5) | C(16)-H(16B)   | 0.9900   |
| C(5)-H(5A)     | 0.9900   | C(17)-O(5)     | 1.209(4) |
| C(5)-H(5B)     | 0.9900   | C(17)-O(4)     | 1.343(3) |
| C(6)-C(10)     | 1.521(5) | C(17)-C(18)    | 1.498(4) |
| C(6)-C(7)      | 1.538(5) | C(18)-C(19)    | 1.392(4) |
| C(6)-H(6)      | 1.0000   | C(18)-C(23)    | 1.394(4) |
| C(7)-C(8)      | 1.515(5) | C(19)-C(20)    | 1.384(4) |
| C(7)-H(7A)     | 0.9900   | C(19)-H(19)    | 0.9500   |
| C(7)-H(7B)     | 0.9900   | C(20)-C(21)    | 1.384(4) |
| C(8)-C(9)      | 1.538(4) | C(20)-H(20)    | 0.9500   |
| C(8)-H(8)      | 1.0000   | C(21)-C(22)    | 1.386(4) |
| C(9)-H(9A)     | 0.9900   | C(21)-N(1)     | 1.469(4) |
| C(9)-H(9B)     | 0.9900   | C(22)-C(23)    | 1.386(4) |
| C(10)-H(10A)   | 0.9900   | C(22)-H(22)    | 0.9500   |
| C(10)-H(10B)   | 0.9900   | C(23)-H(23)    | 0.9500   |
| C(11)-O(3)     | 1.428(3) | N(1)-O(7)      | 1.224(3) |
| C(11)-O(2)     | 1.433(4) | N(1)-O(6)      | 1.227(3) |
| C(11)-C(12)    | 1.508(4) | O(1)-O(2)      | 1.468(3) |
| C(11)-C(16)    | 1.521(4) |                |          |
| O(3)-C(1)-O(1) | 103.6(2) | O(3)-C(1)-C(2) | 109.9(3) |

Fontaine, DiPasquale, and Renslo, Supporting Information

|                  |          |                     |          |
|------------------|----------|---------------------|----------|
| O(1)-C(1)-C(2)   | 108.8(3) | C(6)-C(7)-H(7A)     | 109.7    |
| O(3)-C(1)-C(8)   | 111.1(2) | C(8)-C(7)-H(7B)     | 109.7    |
| O(1)-C(1)-C(8)   | 112.5(2) | C(6)-C(7)-H(7B)     | 109.7    |
| C(2)-C(1)-C(8)   | 110.7(3) | H(7A)-C(7)-H(7B)    | 108.2    |
| C(1)-C(2)-C(3)   | 110.2(3) | C(7)-C(8)-C(1)      | 108.4(3) |
| C(1)-C(2)-C(10)  | 107.1(3) | C(7)-C(8)-C(9)      | 109.9(3) |
| C(3)-C(2)-C(10)  | 109.5(3) | C(1)-C(8)-C(9)      | 109.5(3) |
| C(1)-C(2)-H(2)   | 110.0    | C(7)-C(8)-H(8)      | 109.7    |
| C(3)-C(2)-H(2)   | 110.0    | C(1)-C(8)-H(8)      | 109.7    |
| C(10)-C(2)-H(2)  | 110.0    | C(9)-C(8)-H(8)      | 109.7    |
| C(4)-C(3)-C(2)   | 109.9(3) | C(4)-C(9)-C(8)      | 109.4(3) |
| C(4)-C(3)-H(3A)  | 109.7    | C(4)-C(9)-H(9A)     | 109.8    |
| C(2)-C(3)-H(3A)  | 109.7    | C(8)-C(9)-H(9A)     | 109.8    |
| C(4)-C(3)-H(3B)  | 109.7    | C(4)-C(9)-H(9B)     | 109.8    |
| C(2)-C(3)-H(3B)  | 109.7    | C(8)-C(9)-H(9B)     | 109.8    |
| H(3A)-C(3)-H(3B) | 108.2    | H(9A)-C(9)-H(9B)    | 108.2    |
| C(9)-C(4)-C(3)   | 107.7(3) | C(6)-C(10)-C(2)     | 110.0(3) |
| C(9)-C(4)-C(5)   | 111.3(3) | C(6)-C(10)-H(10A)   | 109.7    |
| C(3)-C(4)-C(5)   | 109.8(3) | C(2)-C(10)-H(10A)   | 109.7    |
| C(9)-C(4)-H(4)   | 109.3    | C(6)-C(10)-H(10B)   | 109.7    |
| C(3)-C(4)-H(4)   | 109.3    | C(2)-C(10)-H(10B)   | 109.7    |
| C(5)-C(4)-H(4)   | 109.3    | H(10A)-C(10)-H(10B) | 108.2    |
| C(4)-C(5)-C(6)   | 109.3(3) | O(3)-C(11)-O(2)     | 104.2(2) |
| C(4)-C(5)-H(5A)  | 109.8    | O(3)-C(11)-C(12)    | 110.4(2) |
| C(6)-C(5)-H(5A)  | 109.8    | O(2)-C(11)-C(12)    | 108.0(2) |
| C(4)-C(5)-H(5B)  | 109.8    | O(3)-C(11)-C(16)    | 109.5(2) |
| C(6)-C(5)-H(5B)  | 109.8    | O(2)-C(11)-C(16)    | 111.2(2) |
| H(5A)-C(5)-H(5B) | 108.3    | C(12)-C(11)-C(16)   | 113.2(2) |
| C(10)-C(6)-C(5)  | 109.1(3) | C(11)-C(12)-C(13)   | 111.6(2) |
| C(10)-C(6)-C(7)  | 109.8(3) | C(11)-C(12)-H(12A)  | 109.3    |
| C(5)-C(6)-C(7)   | 108.9(3) | C(13)-C(12)-H(12A)  | 109.3    |
| C(10)-C(6)-H(6)  | 109.7    | C(11)-C(12)-H(12B)  | 109.3    |
| C(5)-C(6)-H(6)   | 109.7    | C(13)-C(12)-H(12B)  | 109.3    |
| C(7)-C(6)-H(6)   | 109.7    | H(12A)-C(12)-H(12B) | 108.0    |
| C(8)-C(7)-C(6)   | 109.8(3) | C(14)-C(13)-C(12)   | 110.1(3) |
| C(8)-C(7)-H(7A)  | 109.7    | C(14)-C(13)-H(13A)  | 109.6    |

Fontaine, DiPasquale, and Renslo, Supporting Information

|                     |          |                   |          |
|---------------------|----------|-------------------|----------|
| C(12)-C(13)-H(13A)  | 109.6    | C(22)-C(21)-N(1)  | 118.6(3) |
| C(14)-C(13)-H(13B)  | 109.6    | C(23)-C(22)-C(21) | 118.2(3) |
| C(12)-C(13)-H(13B)  | 109.6    | C(23)-C(22)-H(22) | 120.9    |
| H(13A)-C(13)-H(13B) | 108.2    | C(21)-C(22)-H(22) | 120.9    |
| C(15)-C(14)-C(13)   | 109.6(2) | C(22)-C(23)-C(18) | 120.1(3) |
| C(15)-C(14)-H(14A)  | 109.7    | C(22)-C(23)-H(23) | 119.9    |
| C(13)-C(14)-H(14A)  | 109.7    | C(18)-C(23)-H(23) | 119.9    |
| C(15)-C(14)-H(14B)  | 109.7    | O(7)-N(1)-O(6)    | 124.0(3) |
| C(13)-C(14)-H(14B)  | 109.7    | O(7)-N(1)-C(21)   | 118.0(2) |
| H(14A)-C(14)-H(14B) | 108.2    | O(6)-N(1)-C(21)   | 118.0(2) |
| O(4)-C(15)-C(14)    | 111.6(2) | C(1)-O(1)-O(2)    | 100.4(2) |
| O(4)-C(15)-C(16)    | 103.9(2) | C(11)-O(2)-O(1)   | 101.1(2) |
| C(14)-C(15)-C(16)   | 112.1(2) | C(11)-O(3)-C(1)   | 107.5(2) |
| O(4)-C(15)-H(15)    | 109.7    | C(17)-O(4)-C(15)  | 117.6(2) |
| C(14)-C(15)-H(15)   | 109.7    |                   |          |
| C(16)-C(15)-H(15)   | 109.7    |                   |          |
| C(15)-C(16)-C(11)   | 110.9(2) |                   |          |
| C(15)-C(16)-H(16A)  | 109.5    |                   |          |
| C(11)-C(16)-H(16A)  | 109.5    |                   |          |
| C(15)-C(16)-H(16B)  | 109.5    |                   |          |
| C(11)-C(16)-H(16B)  | 109.5    |                   |          |
| H(16A)-C(16)-H(16B) | 108.0    |                   |          |
| O(5)-C(17)-O(4)     | 124.9(3) |                   |          |
| O(5)-C(17)-C(18)    | 123.9(3) |                   |          |
| O(4)-C(17)-C(18)    | 111.2(2) |                   |          |
| C(19)-C(18)-C(23)   | 120.4(3) |                   |          |
| C(19)-C(18)-C(17)   | 117.8(3) |                   |          |
| C(23)-C(18)-C(17)   | 121.8(3) |                   |          |
| C(20)-C(19)-C(18)   | 120.2(3) |                   |          |
| C(20)-C(19)-H(19)   | 119.9    |                   |          |
| C(18)-C(19)-H(19)   | 119.9    |                   |          |
| C(21)-C(20)-C(19)   | 118.3(3) |                   |          |
| C(21)-C(20)-H(20)   | 120.9    |                   |          |
| C(19)-C(20)-H(20)   | 120.9    |                   |          |
| C(20)-C(21)-C(22)   | 122.9(3) |                   |          |
| C(20)-C(21)-N(1)    | 118.5(3) |                   |          |

---

Symmetry transformations used to generate equivalent atoms:

**Table S4.** Anisotropic displacement parameters ( $\text{\AA}^2 \times 10^3$ ) for *trans*-**14**. The anisotropic displacement factor exponent takes the form:  $-2\pi^2 [ h^2 a^{*2} U^{11} + \dots + 2 h k a^* b^* U^{12} ]$ 

|       | U <sup>11</sup> | U <sup>22</sup> | U <sup>33</sup> | U <sup>23</sup> | U <sup>13</sup> | U <sup>12</sup> |
|-------|-----------------|-----------------|-----------------|-----------------|-----------------|-----------------|
| C(1)  | 25(2)           | 34(2)           | 32(2)           | 2(1)            | 1(1)            | 0(1)            |
| C(2)  | 41(2)           | 31(2)           | 39(2)           | -6(1)           | 3(1)            | -1(1)           |
| C(3)  | 37(2)           | 37(2)           | 62(2)           | 4(2)            | 0(2)            | -8(2)           |
| C(4)  | 32(2)           | 43(2)           | 58(2)           | 11(2)           | 17(2)           | 5(2)            |
| C(5)  | 54(2)           | 48(2)           | 51(2)           | 21(2)           | 19(2)           | 11(2)           |
| C(6)  | 43(2)           | 54(2)           | 41(2)           | 18(2)           | 4(2)            | 14(2)           |
| C(7)  | 44(2)           | 48(2)           | 31(2)           | 3(1)            | -1(1)           | 0(2)            |
| C(8)  | 36(2)           | 29(2)           | 33(2)           | -1(1)           | 2(1)            | -1(1)           |
| C(9)  | 41(2)           | 37(2)           | 37(2)           | 3(1)            | 12(1)           | 8(2)            |
| C(10) | 40(2)           | 32(2)           | 59(2)           | 8(2)            | 13(2)           | 7(2)            |
| C(11) | 29(2)           | 36(2)           | 27(1)           | 6(1)            | 2(1)            | -1(1)           |
| C(12) | 31(2)           | 37(2)           | 30(1)           | -2(1)           | -2(1)           | 0(1)            |
| C(13) | 35(2)           | 35(2)           | 32(2)           | -3(1)           | -2(1)           | -7(1)           |
| C(14) | 28(2)           | 40(2)           | 32(2)           | -1(1)           | 2(1)            | -6(1)           |
| C(15) | 29(2)           | 33(2)           | 24(1)           | -2(1)           | 2(1)            | -1(1)           |
| C(16) | 32(2)           | 32(2)           | 30(2)           | -1(1)           | 1(1)            | -3(1)           |
| C(17) | 18(1)           | 35(2)           | 25(1)           | 4(1)            | -1(1)           | -5(1)           |
| C(18) | 14(1)           | 25(1)           | 32(1)           | 0(1)            | -1(1)           | 0(1)            |
| C(19) | 20(1)           | 27(1)           | 28(1)           | 1(1)            | -1(1)           | -2(1)           |
| C(20) | 20(1)           | 29(2)           | 30(1)           | 5(1)            | -1(1)           | 0(1)            |
| C(21) | 16(1)           | 33(2)           | 26(1)           | -5(1)           | 1(1)            | -2(1)           |
| C(22) | 18(1)           | 26(2)           | 35(1)           | 2(1)            | 1(1)            | -2(1)           |
| C(23) | 17(1)           | 34(2)           | 26(1)           | 2(1)            | 0(1)            | -4(1)           |
| N(1)  | 25(1)           | 31(1)           | 33(1)           | -2(1)           | 4(1)            | -2(1)           |
| O(1)  | 29(1)           | 39(1)           | 36(1)           | 5(1)            | -2(1)           | -1(1)           |
| O(2)  | 29(1)           | 34(1)           | 35(1)           | 6(1)            | 3(1)            | 0(1)            |
| O(3)  | 27(1)           | 39(1)           | 32(1)           | 5(1)            | 3(1)            | 3(1)            |
| O(4)  | 31(1)           | 28(1)           | 26(1)           | -1(1)           | 1(1)            | 0(1)            |
| O(5)  | 33(1)           | 26(1)           | 32(1)           | 0(1)            | 0(1)            | 2(1)            |
| O(6)  | 33(1)           | 38(1)           | 38(1)           | -4(1)           | 7(1)            | 3(1)            |
| O(7)  | 47(1)           | 43(1)           | 29(1)           | -3(1)           | -8(1)           | 2(1)            |

**Table S5.** Hydrogen coordinates ( $\times 10^4$ ) and isotropic displacement parameters ( $\text{\AA}^2 \times 10^3$ ) for *trans*-**14**.

|        | x    | y     | z    | U(eq) |
|--------|------|-------|------|-------|
| H(2)   | 3007 | 5708  | 3979 | 44    |
| H(3A)  | -154 | 6306  | 4156 | 54    |
| H(3B)  | 363  | 5202  | 4288 | 54    |
| H(4)   | -743 | 6331  | 4647 | 53    |
| H(5A)  | 1716 | 5085  | 4780 | 61    |
| H(5B)  | 2007 | 6112  | 4961 | 61    |
| H(6)   | 5201 | 5558  | 4789 | 55    |
| H(7A)  | 4711 | 7380  | 4835 | 49    |
| H(7B)  | 6213 | 7148  | 4581 | 49    |
| H(8)   | 3779 | 8370  | 4437 | 39    |
| H(9A)  | 1085 | 7860  | 4738 | 46    |
| H(9B)  | 296  | 7877  | 4421 | 46    |
| H(10A) | 4013 | 4715  | 4379 | 52    |
| H(10B) | 5767 | 5507  | 4298 | 52    |
| H(12A) | 8590 | 8388  | 3935 | 39    |
| H(12B) | 7027 | 9096  | 4102 | 39    |
| H(13A) | 6253 | 10022 | 3690 | 41    |
| H(13B) | 8642 | 10048 | 3735 | 41    |
| H(14A) | 7876 | 9630  | 3260 | 40    |
| H(14B) | 9055 | 8694  | 3404 | 40    |
| H(15)  | 4767 | 8794  | 3330 | 34    |
| H(16A) | 6977 | 7080  | 3556 | 38    |
| H(16B) | 4582 | 7138  | 3523 | 38    |
| H(19)  | 5837 | 8760  | 2309 | 30    |
| H(20)  | 6194 | 7716  | 1912 | 31    |
| H(22)  | 7410 | 5260  | 2412 | 31    |
| H(23)  | 6964 | 6302  | 2808 | 31    |



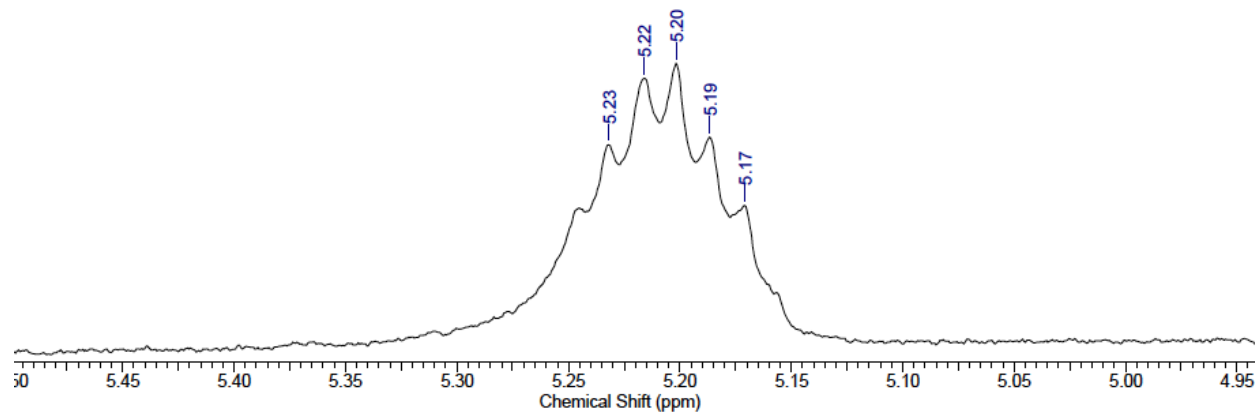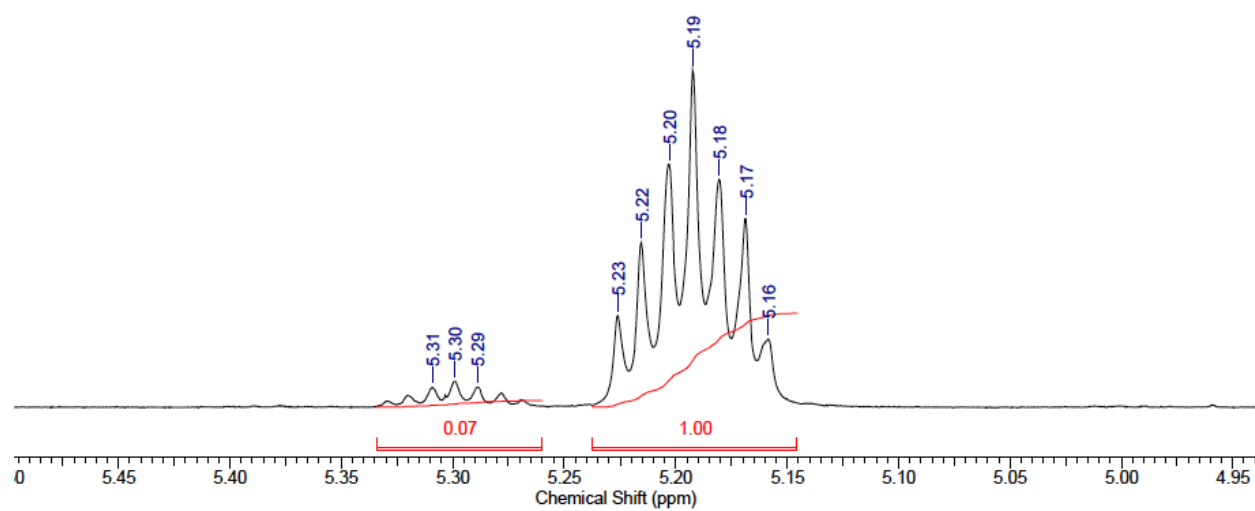

**Figure S1.** Diagnostic signals for the 3'' methine **H-C-OC(O)-Ar** resonance in the  $^1\text{H}$  NMR spectra of the crystal used for X-ray data collection (top) and for the material from which the crystal was grown (bottom). This data establishes that the crystal used for X-ray data collection comprised the major diastereomer from the 90:10 mixture.

Copies of NMR spectra and LC chromatograms for new compounds

Compound 7 (90:10 dr)

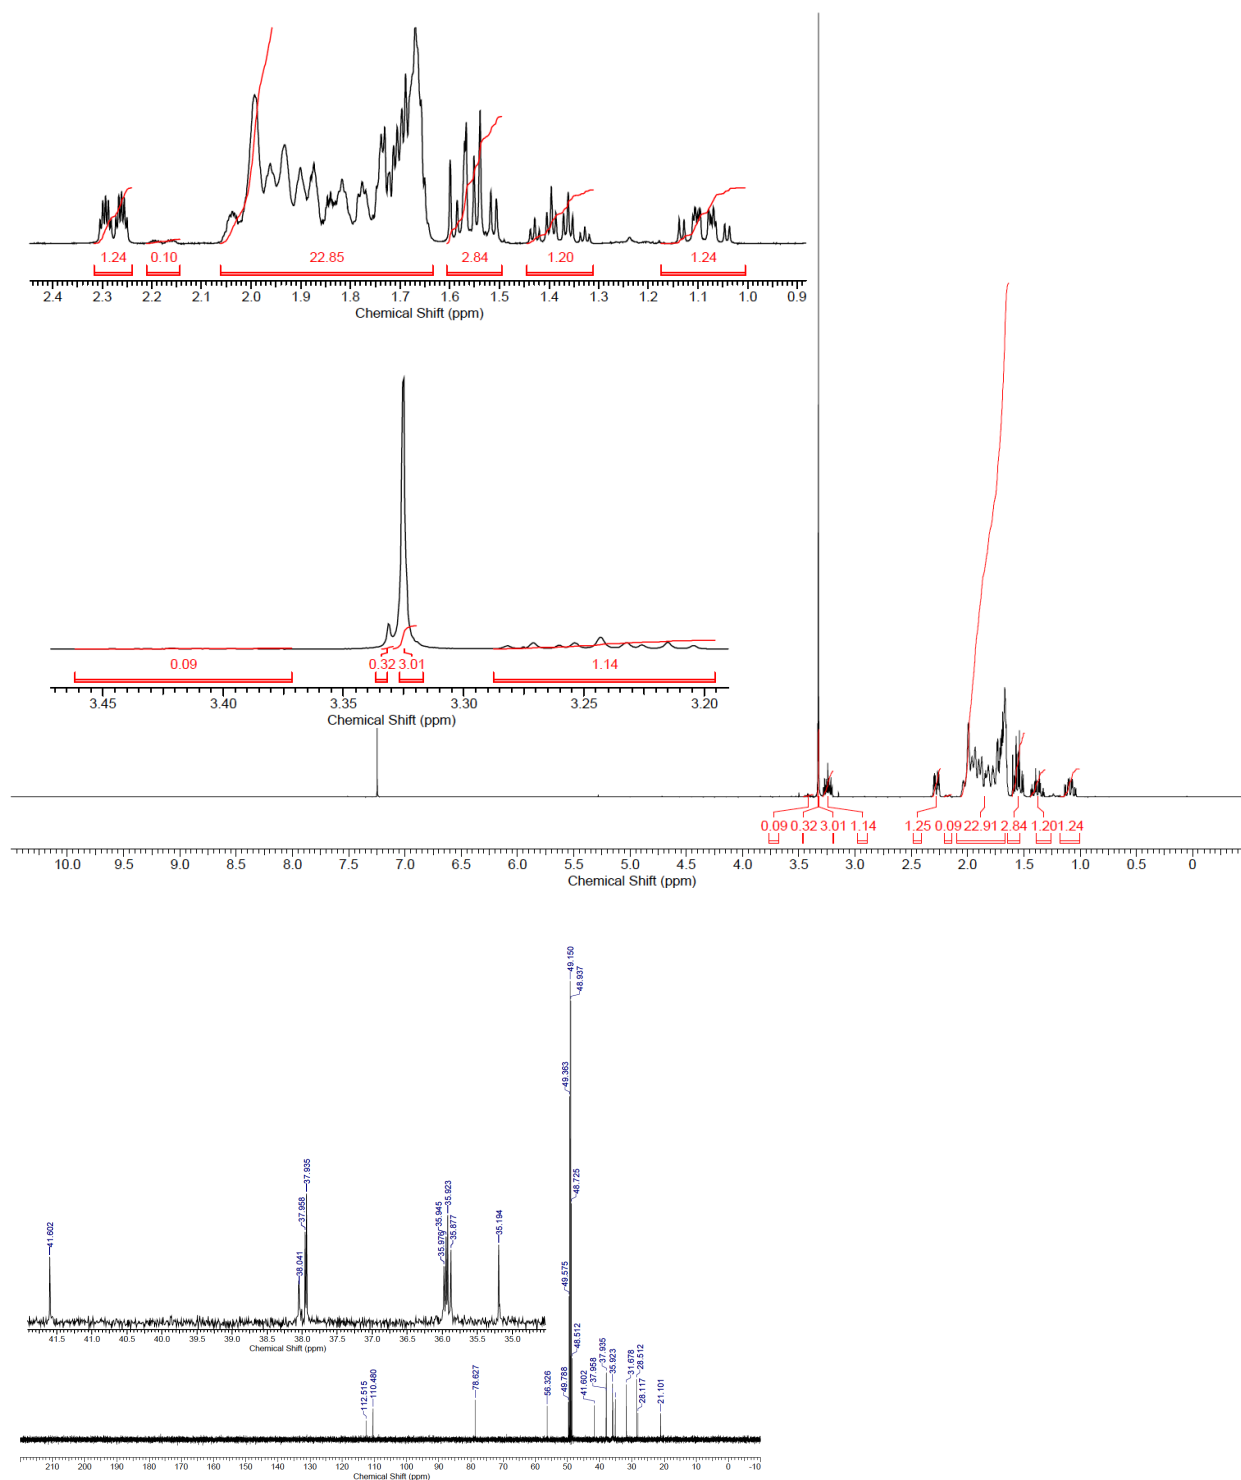

**Compound 8 (minor diastereomer)**

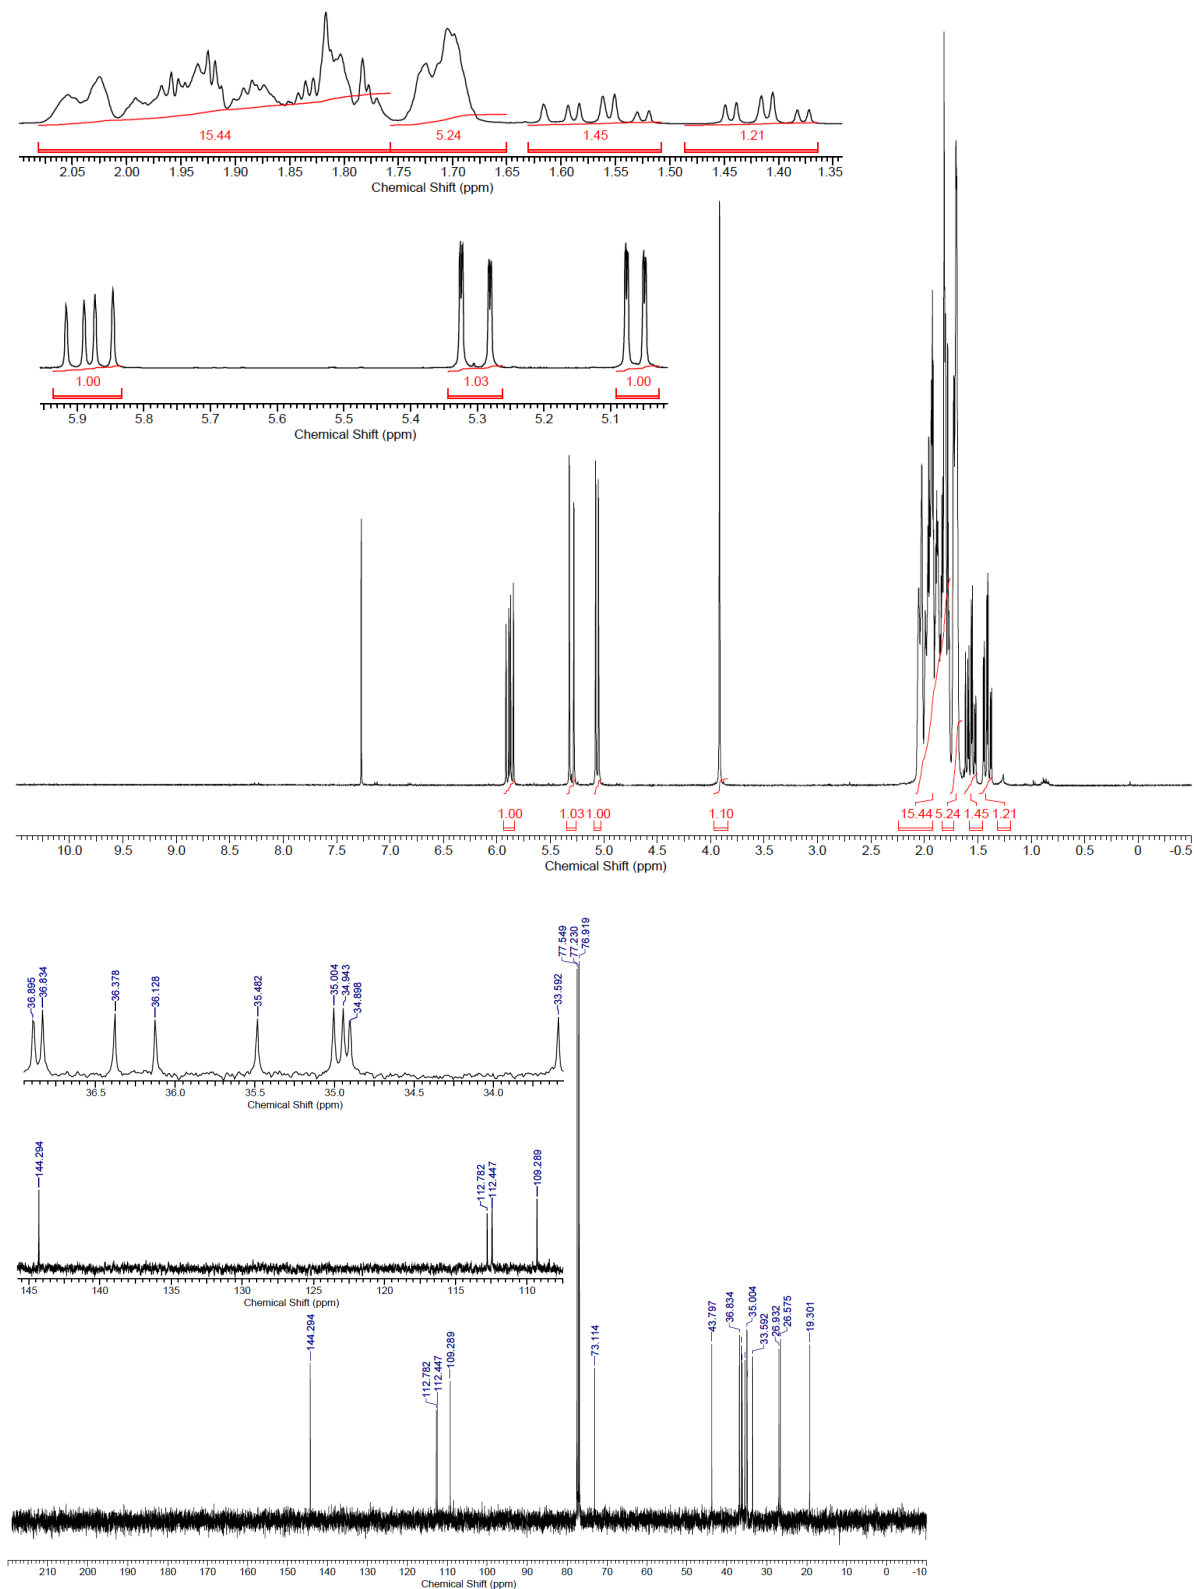

**Compound 8 (major diastereomer)**

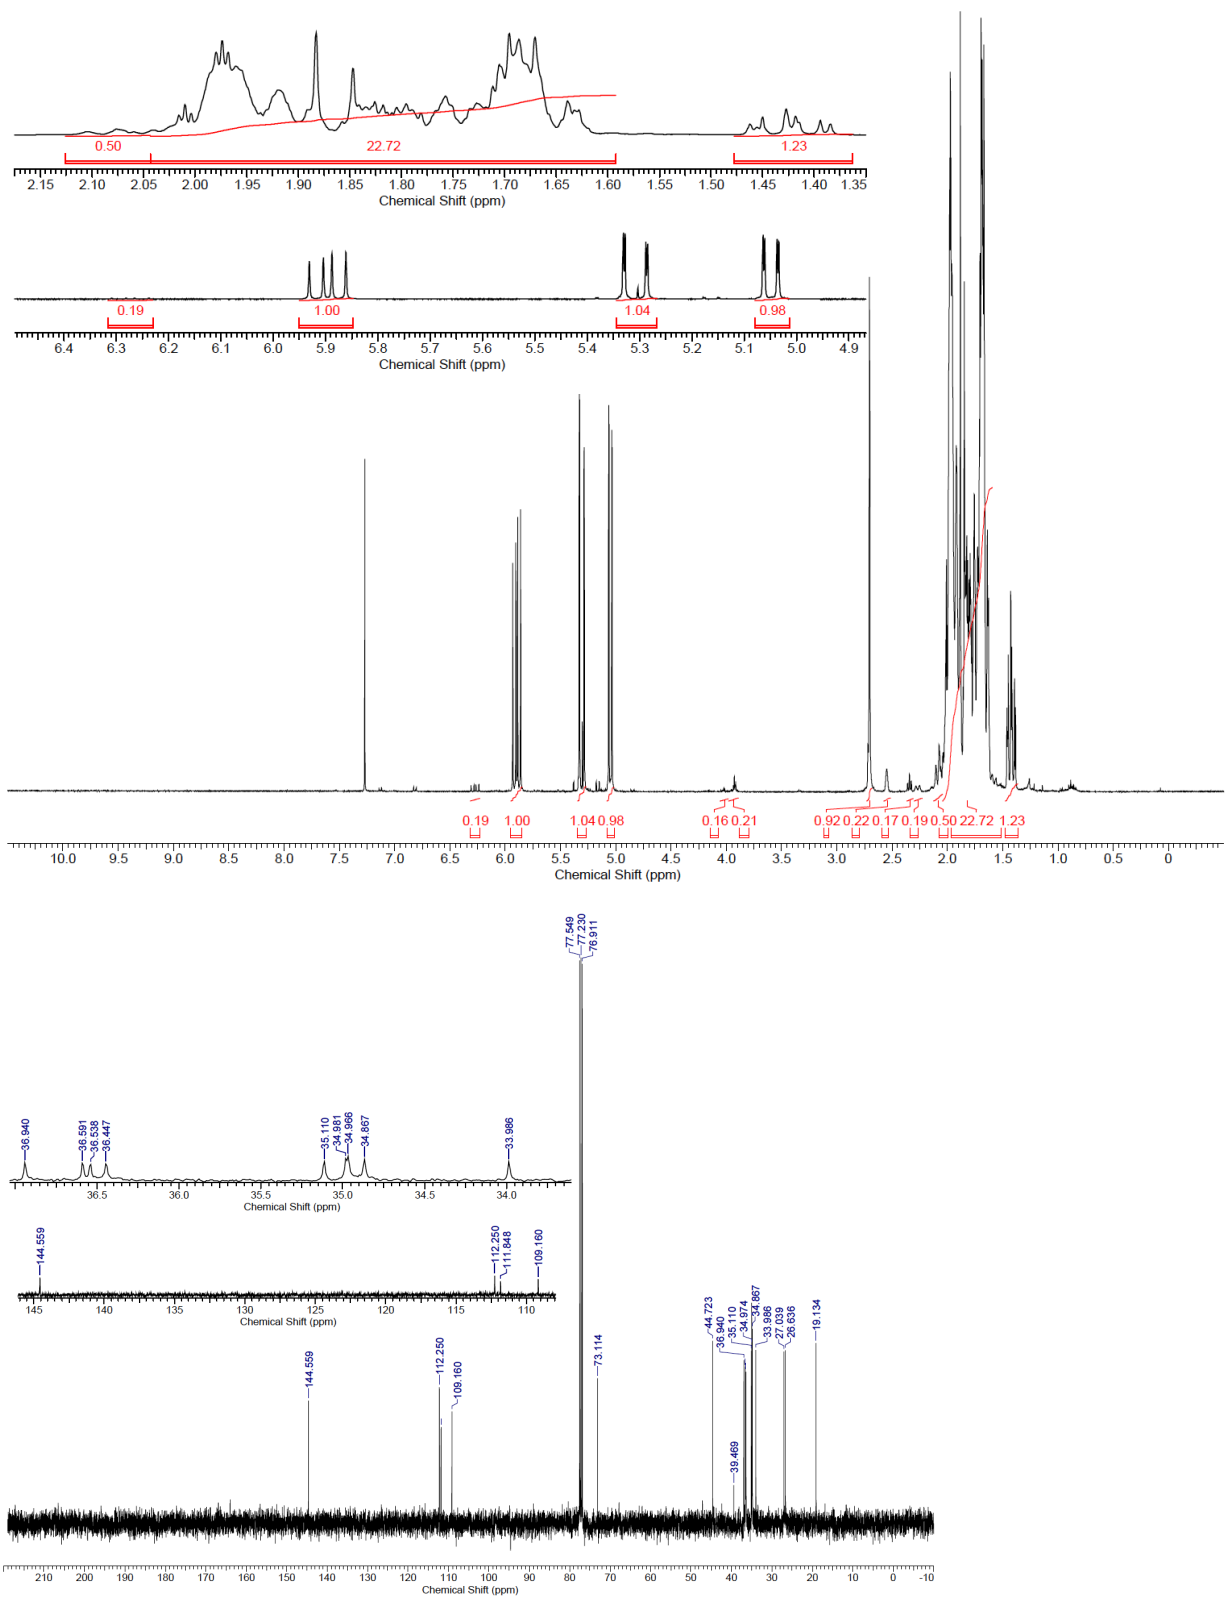

**Compound 10**

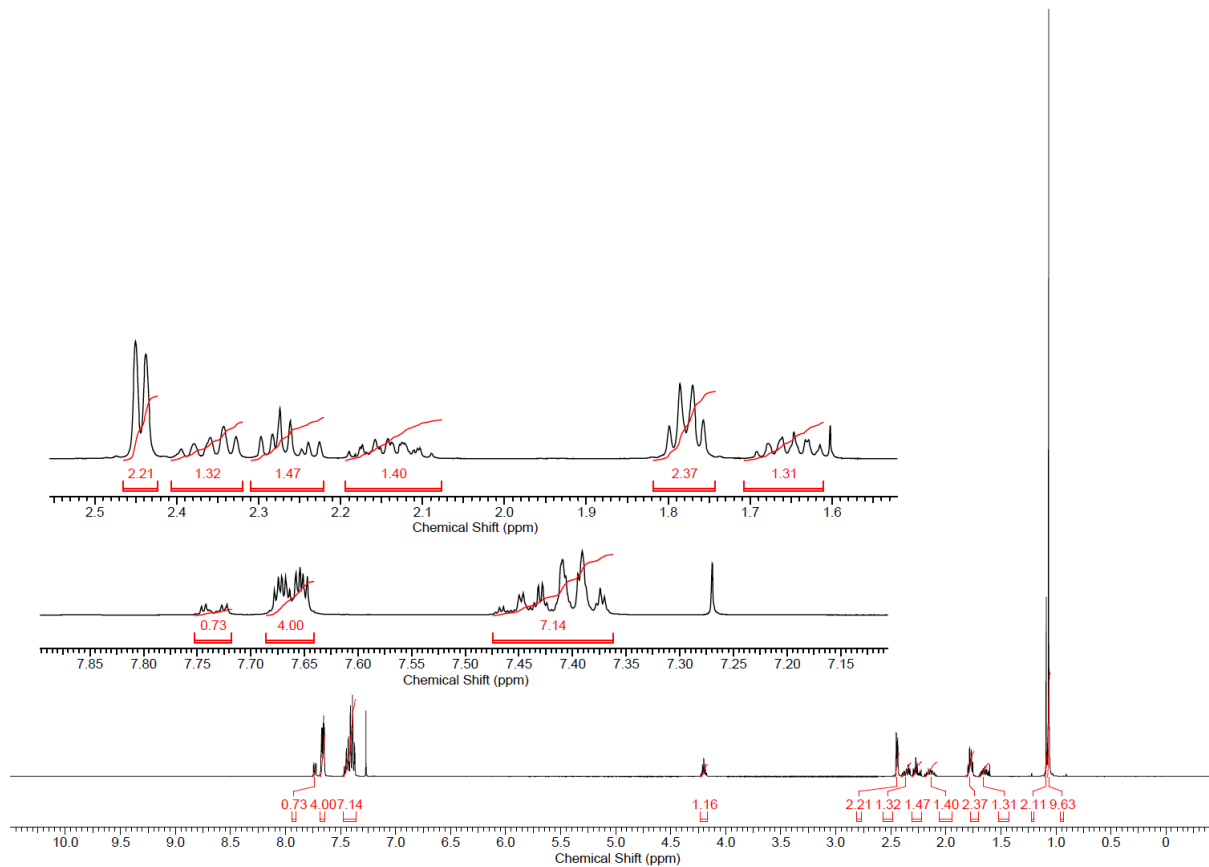

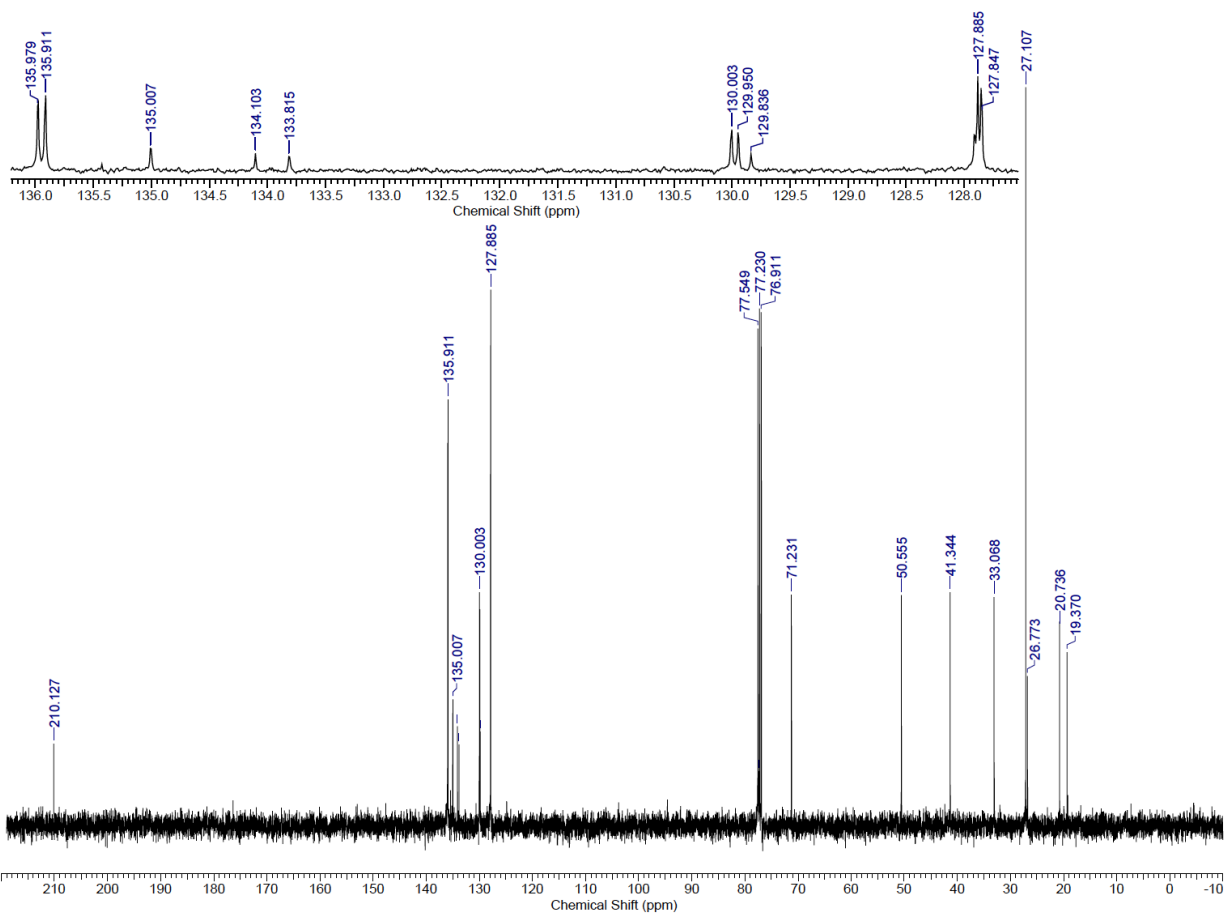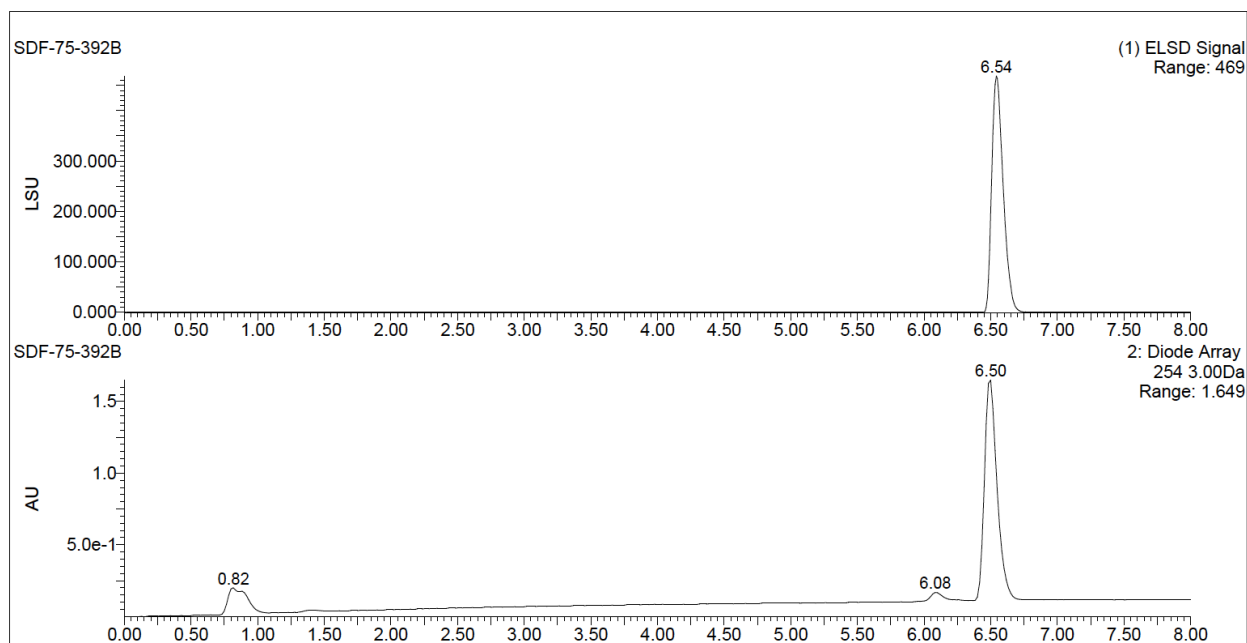

**Compound 13 (90:10 dr)**

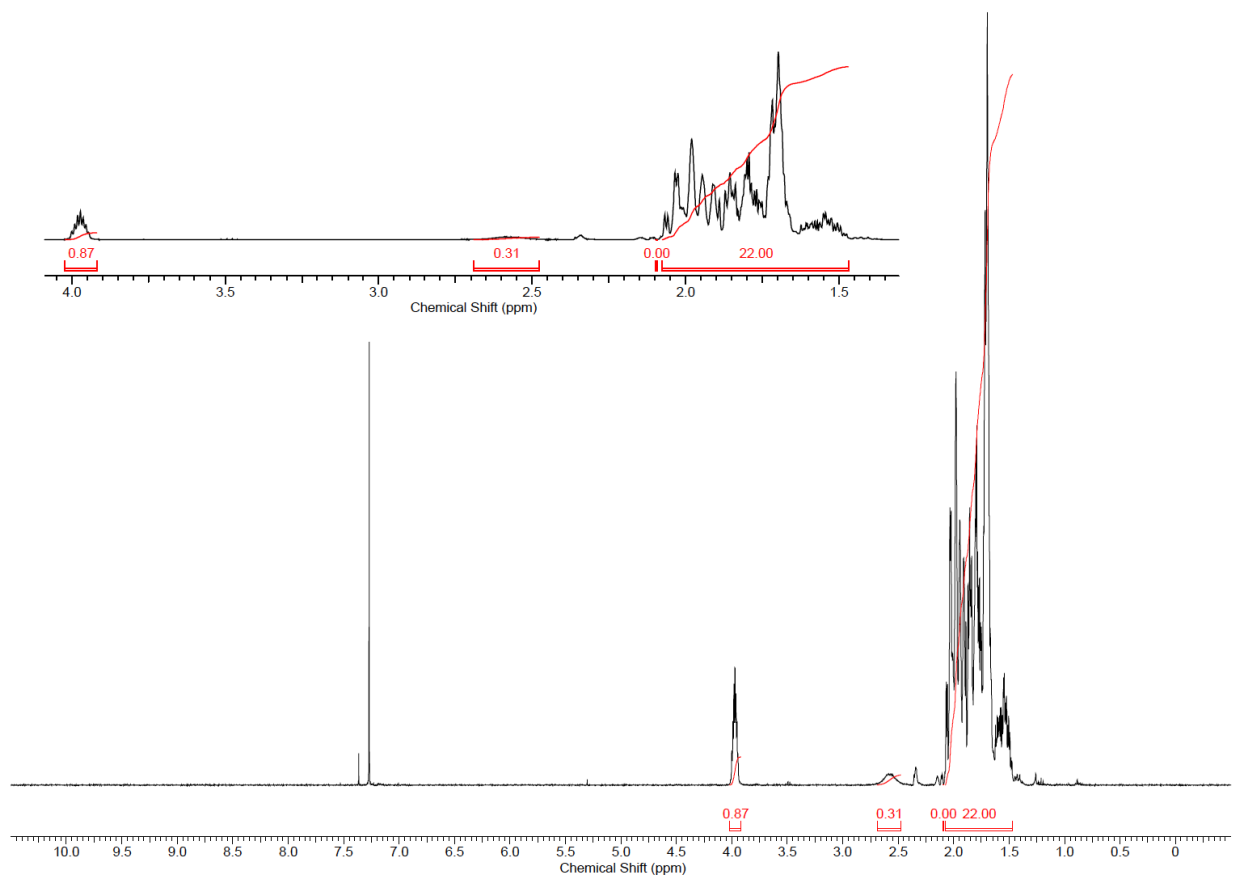

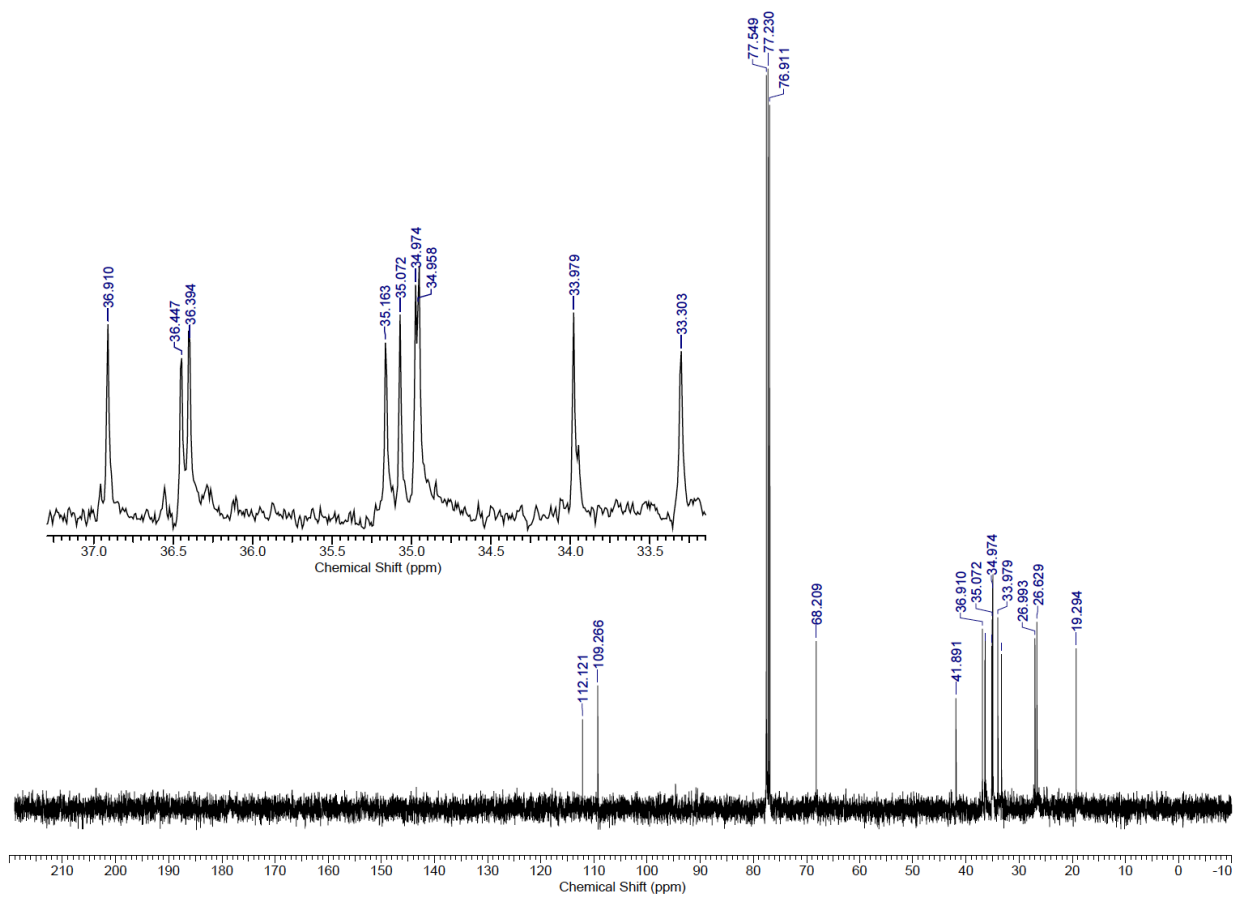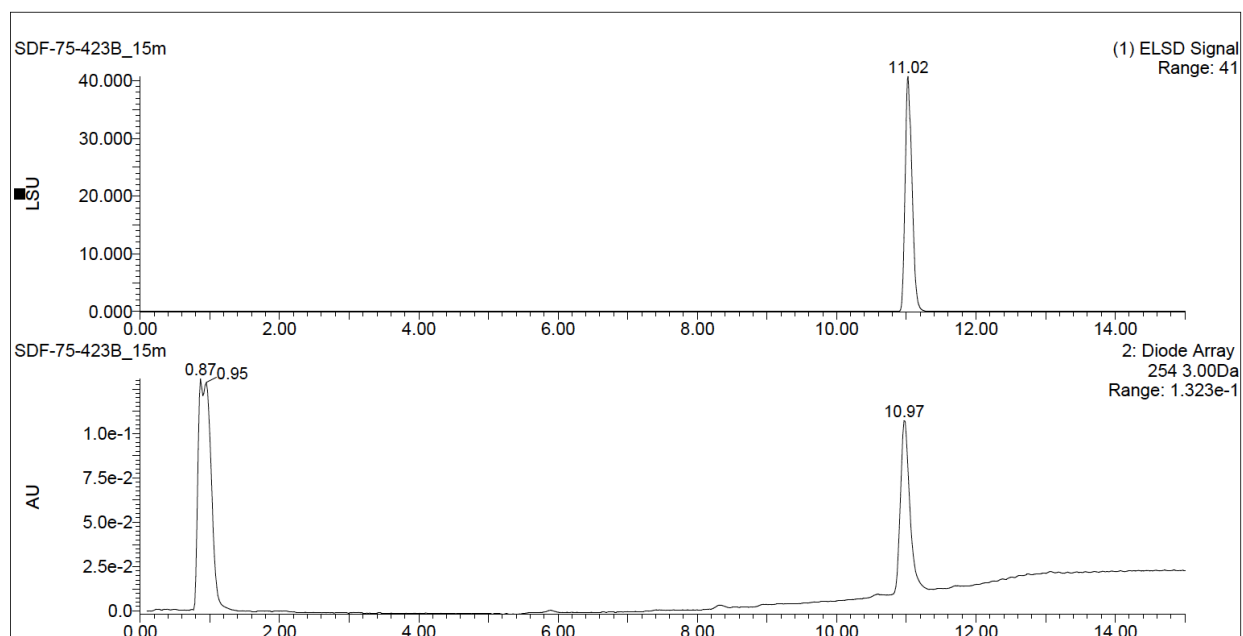



Compound 14

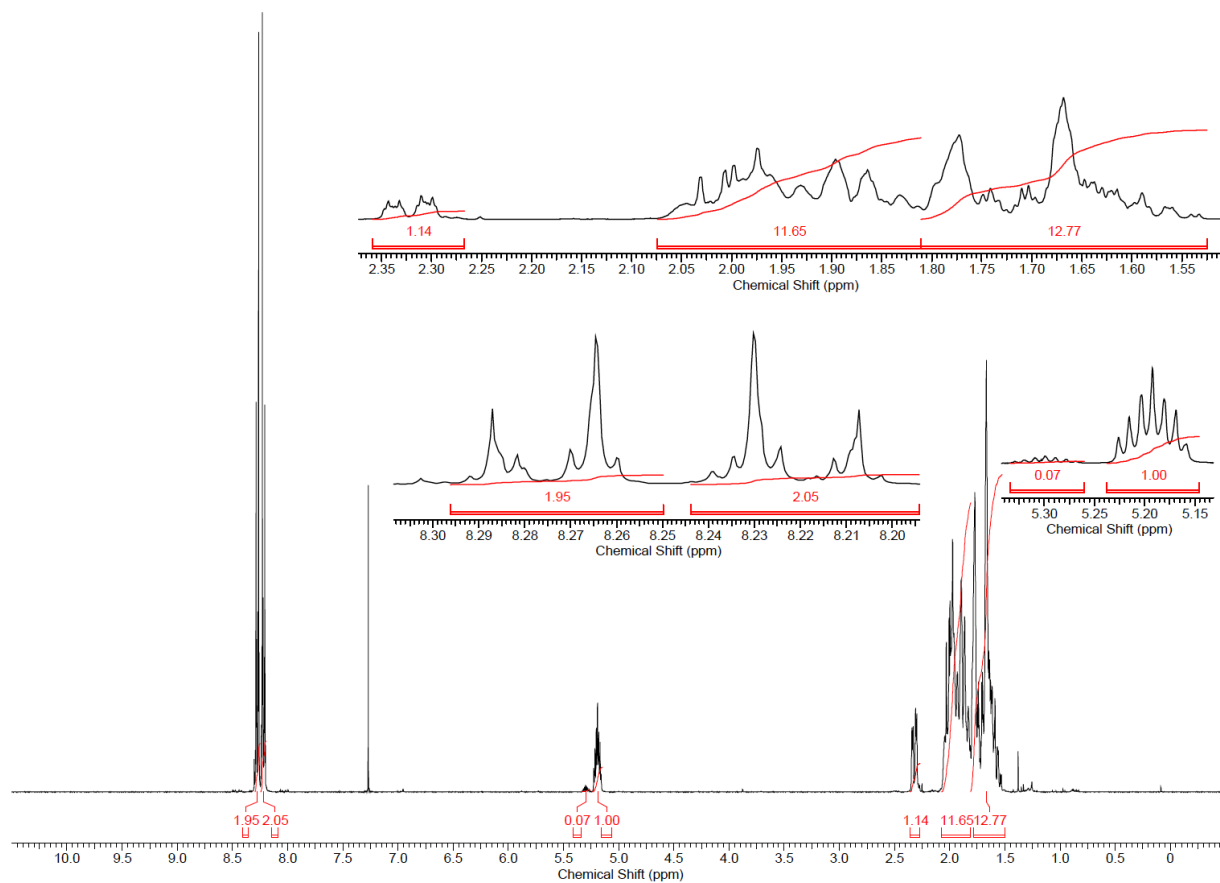

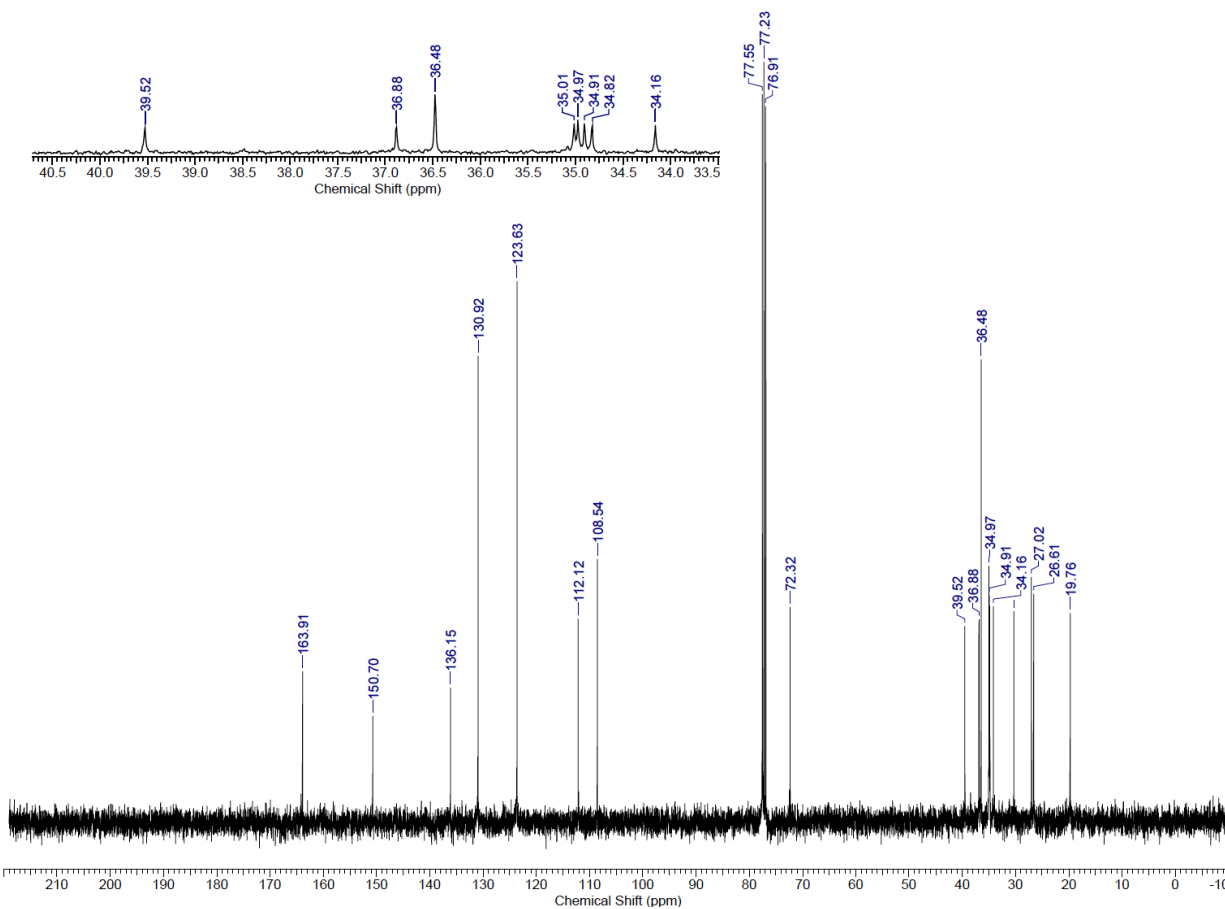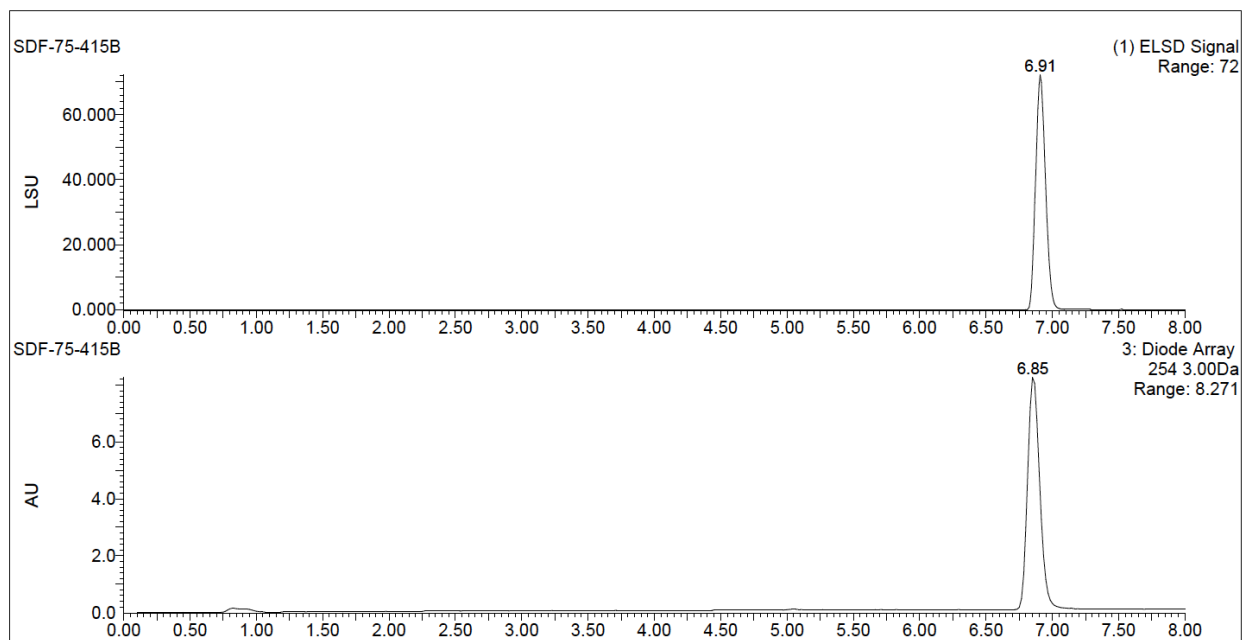

Compound 15

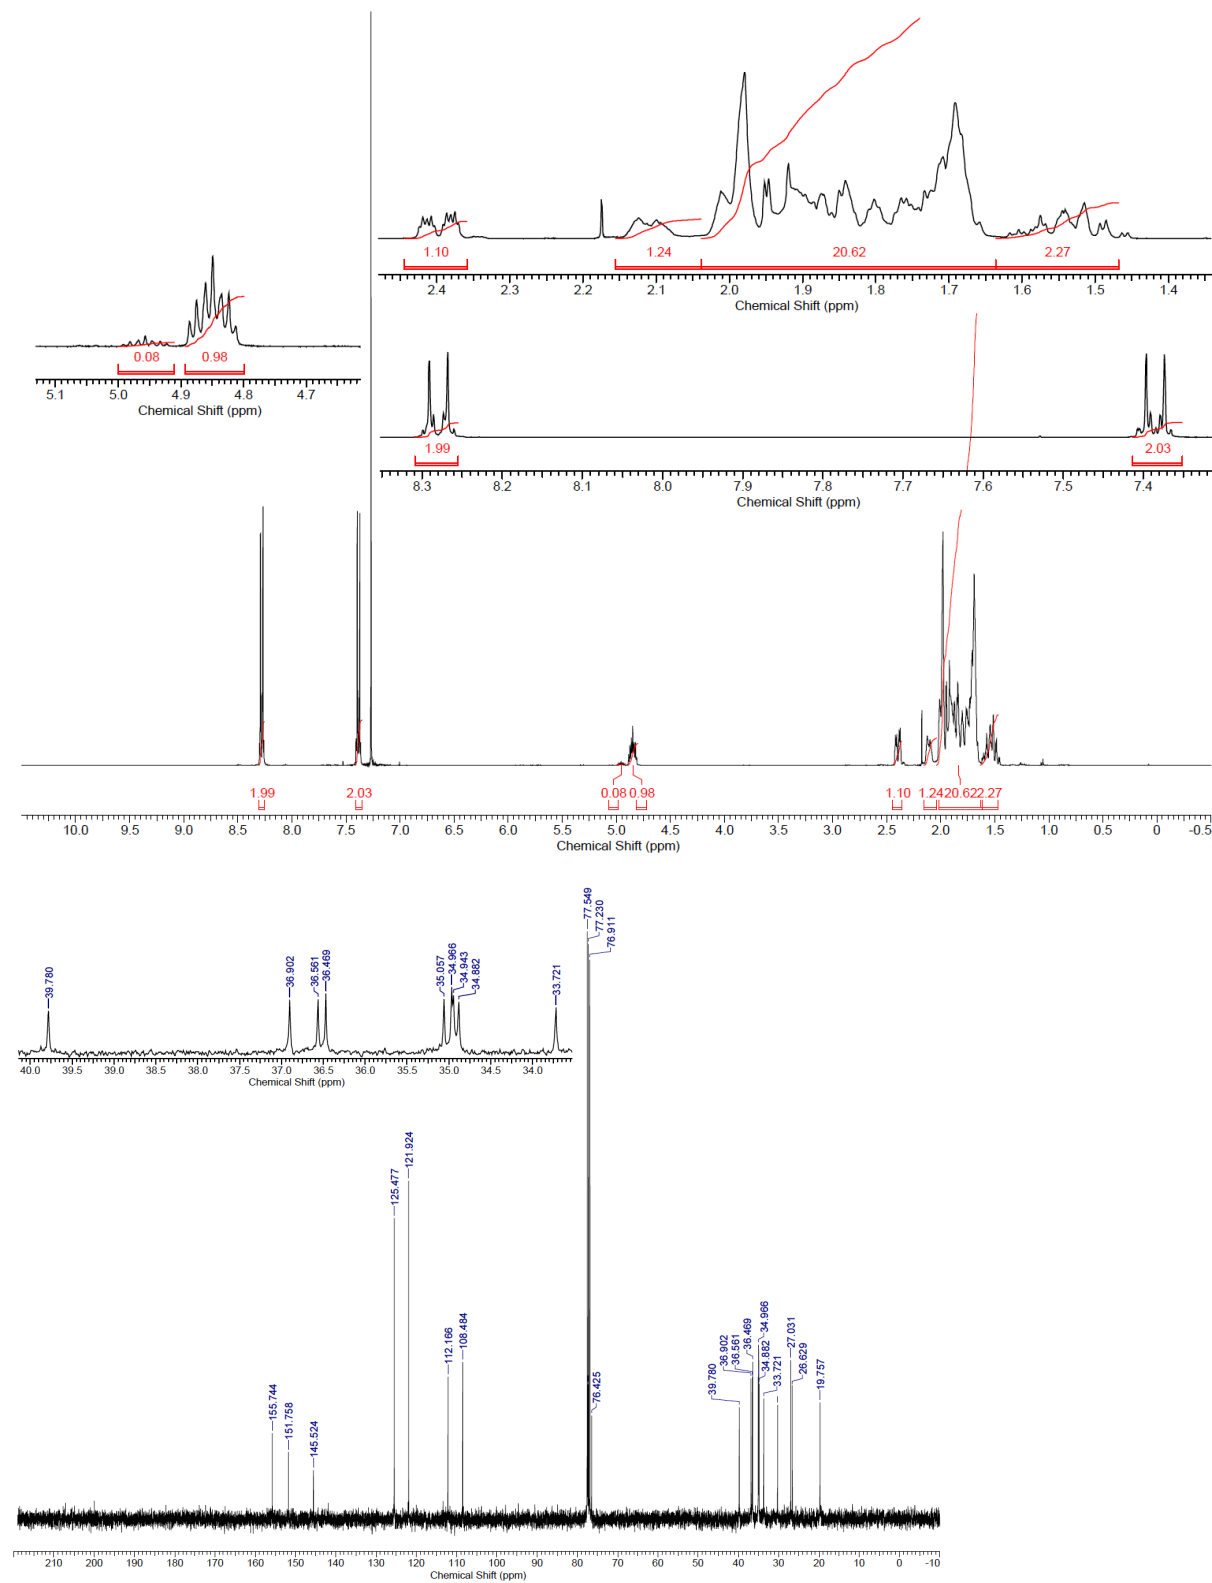

**Compound 16 (>95:5 dr)**

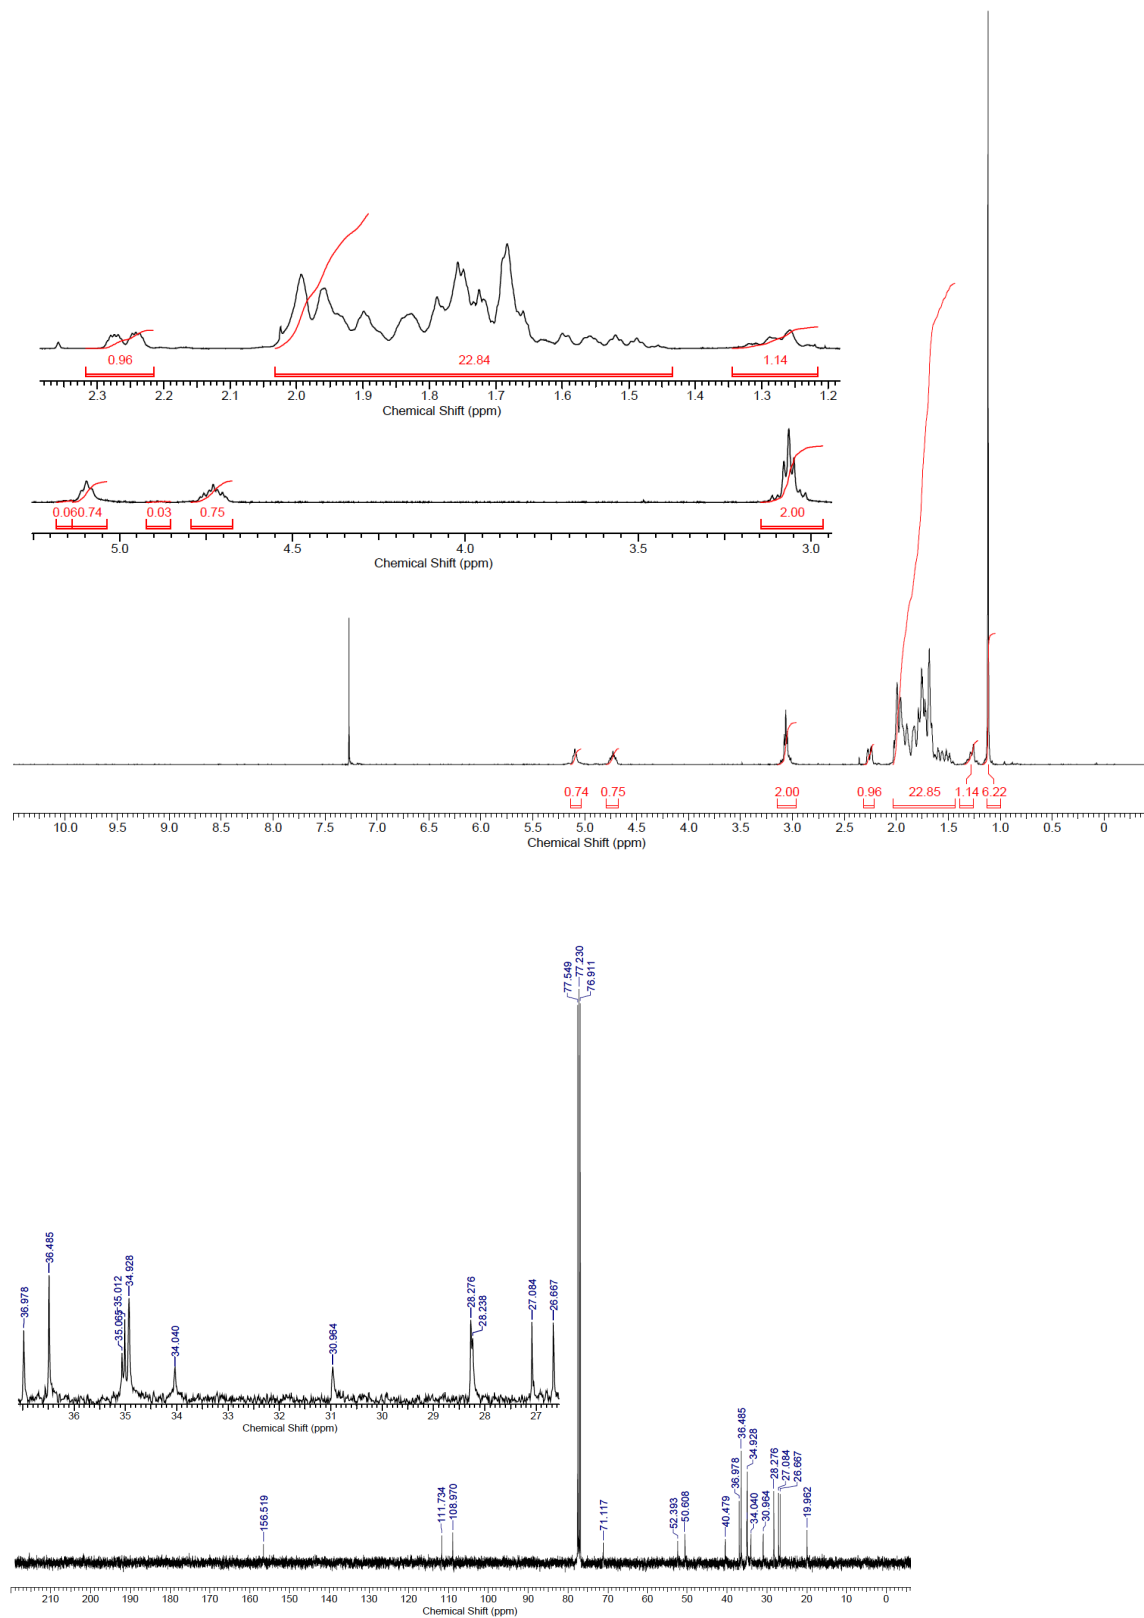

**checkCIF/PLATON report**

You have not supplied any structure factors. As a result the full set of tests cannot be run.

THIS REPORT IS FOR GUIDANCE ONLY. IF USED AS PART OF A REVIEW PROCEDURE FOR PUBLICATION, IT SHOULD NOT REPLACE THE EXPERTISE OF AN EXPERIENCED CRYSTALLOGRAPHIC REFEREE.

No syntax errors found.    CIF dictionary    Interpreting this report

**Datablock: ucsf05**


---

Bond precision:    C-C = 0.0045 A                    Wavelength=1.54178

Cell:                    a=6.6484(4)            b=12.9963(8)            c=47.799(3)  
                          alpha=90                beta=90                 gamma=90

Temperature:            100 K

|                        | Calculated   | Reported     |
|------------------------|--------------|--------------|
| Volume                 | 4130.1(4)    | 4130.1(4)    |
| Space group            | P b c a      | P b c a      |
| Hall group             | -P 2ac 2ab   | -P 2ac 2ab   |
| Moiety formula         | C23 H27 N O7 | ?            |
| Sum formula            | C23 H27 N O7 | C23 H27 N O7 |
| Mr                     | 429.46       | 429.45       |
| Dx, g cm <sup>-3</sup> | 1.381        | 1.381        |
| Z                      | 8            | 8            |
| Mu (mm <sup>-1</sup> ) | 0.850        | 0.850        |
| F000                   | 1824.0       | 1824.0       |
| F000'                  | 1830.10      |              |
| h,k,lmax               | 8,15,57      | 7,15,57      |
| Nref                   | 3775         | 3753         |
| Tmin,Tmax              | 0.934,0.975  | 0.783,0.929  |
| Tmin'                  | 0.934        |              |

Correction method= MULTI-SCAN

Data completeness= 0.994                    Theta(max)= 68.287

R(reflections)= 0.0712( 3576)                wR2(reflections)= 0.1873( 3753)

S = 1.076                                        Npar= 280

---

The following ALERTS were generated. Each ALERT has the format  
**test-name ALERT alert-type alert-level.**  
Click on the hyperlinks for more details of the test.

---

**Alert level C**

```

PLAT230_ALERT_2_C Hirshfeld Test Diff for  O5  --  C17  ..          5.4 su
PLAT340_ALERT_3_C Low Bond Precision on  C-C Bonds ..... 0.0045 Ang.

```

**Alert level G**

```

PLAT083_ALERT_2_G SHELXL Second Parameter in WGHT Unusually Large.      9.75 Why ?
PLAT793_ALERT_4_G The Model has Chirality at C1 ..... S Verify
PLAT793_ALERT_4_G The Model has Chirality at C8 ..... S Verify
PLAT793_ALERT_4_G The Model has Chirality at C11 ..... R Verify
PLAT793_ALERT_4_G The Model has Chirality at C15 ..... R Verify

```

---

```

0 ALERT level A = Most likely a serious problem - resolve or explain
0 ALERT level B = A potentially serious problem, consider carefully
2 ALERT level C = Check. Ensure it is not caused by an omission or oversight
5 ALERT level G = General information/check it is not something unexpected

```

```

0 ALERT type 1 CIF construction/syntax error, inconsistent or missing data
2 ALERT type 2 Indicator that the structure model may be wrong or deficient
1 ALERT type 3 Indicator that the structure quality may be low
4 ALERT type 4 Improvement, methodology, query or suggestion
0 ALERT type 5 Informative message, check

```

---

It is advisable to attempt to resolve as many as possible of the alerts in all categories. Often the minor alerts point to easily fixed oversights, errors and omissions in your CIF or refinement strategy, so attention to these fine details can be worthwhile. In order to resolve some of the more serious problems it may be necessary to carry out additional measurements or structure refinements. However, the purpose of your study may justify the reported deviations and the more serious of these should normally be commented upon in the discussion or experimental section of a paper or in the "special\_details" fields of the CIF. checkCIF was carefully designed to identify outliers and unusual parameters, but every test has its limitations and alerts that are not important in a particular case may appear. Conversely, the absence of alerts does not guarantee there are no aspects of the results needing attention. It is up to the individual to critically assess their own results and, if necessary, seek expert advice.

**Publication of your CIF in IUCr journals**

A basic structural check has been run on your CIF. These basic checks will be run on all CIFs submitted for publication in IUCr journals (*Acta Crystallographica*, *Journal of Applied Crystallography*, *Journal of Synchrotron Radiation*); however, if you intend to submit to *Acta Crystallographica Section C* or *E*, you should make sure that full publication checks are run on the final version of your CIF prior to submission.

**Publication of your CIF in other journals**

Please refer to the *Notes for Authors* of the relevant journal for any special instructions relating to CIF submission.

---

PLATON version of 20/08/2014; check.def file version of 18/08/2014

Datablock ucsf05 - ellipsoid plot

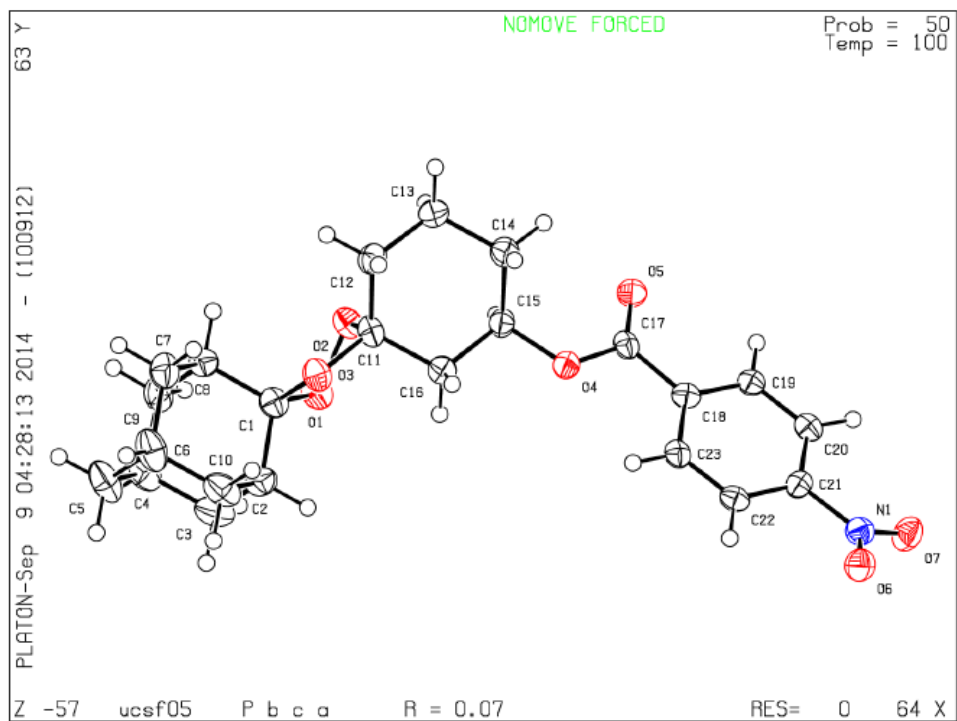

Supplement: ol5028392_si_001.pdf [file ol5028392_si_001.pdf]
